# Supplementary material for: Tell Me Why I Do Not Like Mondays
Source: MDPI journal article supplement (doi:10.3390/math10111850), 2022-05-27
Supplement: s1 [file s1]

**Table S1.** Summary statistics for the Monday returns categorized by week  
(continuation of Table 5).

**Panel B: Apple.**

|                     | First<br>Monday | Second<br>Monday | Third<br>Monday | Fourth<br>Monday | Fifth<br>Monday | First<br>Three<br>Mondays | Last<br>Two<br>Mondays | Difference<br>In the Two<br>Periods | All<br>Mondays |
|---------------------|-----------------|------------------|-----------------|------------------|-----------------|---------------------------|------------------------|-------------------------------------|----------------|
| 1.08/2011–02/2020   |                 |                  |                 |                  |                 |                           |                        |                                     |                |
| Mean                | 2.013 c         | 2.067 a          | −0.079          | −0.355           | 3.356 a         | 1.164b                    | 1.394 a                | 0.229                               | 1.264 a        |
| T-Statistic         | (1.68)          | (3.57)           | (−0.09)         | (−0.50)          | (4.90)          | (2.37)                    | (2.72)                 | (0.32)                              | (3.55)         |
| Welch F-test        |                 |                  |                 |                  |                 |                           |                        | (0.10)                              |                |
| Percentage positive | 72.22%          | 69.07%           | 55.79%          | 39.13%           | 74.39%          | 64.04%                    | 55.75%                 |                                     | 60.45%         |
| #Obs                | 36              | 97               | 95              | 92               | 82              | 228                       | 174                    |                                     | 402            |
| 2. 08/2011–12/2015  |                 |                  |                 |                  |                 |                           |                        |                                     |                |
| Mean                | 2.417 c         | 1.424 c          | 0.889           | −0.705           | 3.672 a         | 1.362 b                   | 1.338 c                | −0.024                              | 1.352 a        |
| T-Statistic         | (1.65)          | (1.89)           | (1.05)          | (−0.73)          | (3.65)          | (2.58)                    | (1.83)                 | (0.03)                              | (3.11)         |
| Welch F-test        |                 |                  |                 |                  |                 |                           |                        | (0.001)                             |                |
| Percentage positive | 68.42%          | 66.00%           | 53.06%          | 39.58%           | 73.81%          | 61.02%                    | 55.56%                 |                                     | 58.65%         |
| #Obs                | 19              | 50               | 49              | 48               | 42              | 118                       | 90                     |                                     | 208            |
| 3. 01/2016–02/2020  |                 |                  |                 |                  |                 |                           |                        |                                     |                |
| Mean                | 1.561           | 2.751 a          | −1.111          | 0.026            | 3.023 a         | 0.952                     | 1.453 b                | 0.501                               | 1.169 b        |
| T-Statistic         | (0.79)          | (3.11)           | (−0.68)         | (0.03)           | (3.23)          | (1.12)                    | (2.01)                 | (0.43)                              | (2.04)         |
| Welch F-test        |                 |                  |                 |                  |                 |                           |                        | (0.20)                              |                |
| Percentage positive | 76.47%          | 72.34%           | 58.70%          | 38.64%           | 75.00%          | 67.27%                    | 55.95%                 |                                     | 62.37%         |
| #Obs                | 17              | 47               | 46              | 44               | 40              | 110                       | 84                     |                                     | 194            |

**Panel C: Goldman Sachs.**

|                     | First<br>Monday | Second<br>Monday | Third<br>Monday | Fourth<br>Monday | Fifth<br>Monday | First<br>Three<br>Monday<br>s | Last<br>Two<br>Monday<br>s | Difference<br>In the Two<br>Periods | All<br>Mondays |
|---------------------|-----------------|------------------|-----------------|------------------|-----------------|-------------------------------|----------------------------|-------------------------------------|----------------|
| 1.10/2011–02/2020   |                 |                  |                 |                  |                 |                               |                            |                                     |                |
| Mean                | 0.797           | 2.225 a          | −0.703          | 0.424            | 3.457 a         | 0.786 c                       | 1.851 a                    | 1.065                               | 1.243 a        |
| T-Statistic         | (0.74)          | (3.82)           | (−1.00)         | (0.66)           | (4.72)          | (1.84)                        | (3.73)                     | (1.63)                              | (3.84)         |
| Welch F-test        |                 |                  |                 |                  |                 |                               |                            | (2.65)                              |                |
| Percentage positive | 57.14%          | 74.23%           | 40.43%          | 51.11%           | 73.75%          | 57.52%                        | 61.76%                     |                                     | 59.34%         |
| #Obs                | 35              | 97               | 94              | 90               | 80              | 226                           | 170                        |                                     | 396            |
| 2. 10/2011–12/2015  |                 |                  |                 |                  |                 |                               |                            |                                     |                |
| Mean                | 2.651 b         | 1.979 a          | −0.493          | 0.719            | 4.692 a         | 1.060 a                       | 2.567 a                    | 1.507 b                             | 1.702 a        |
| T-Statistic         | (2.66)          | (3.71)           | (−0.76)         | (0.77)           | (6.07)          | (2.63)                        | (3.95)                     | (2.07)                              | (4.68)         |
| Welch F-test        |                 |                  |                 |                  |                 |                               |                            | (3.89)                              |                |
| Percentage positive | 66.67%          | 80.00%           | 45.83%          | 52.17%           | 82.50%          | 63.79%                        | 66.28%                     |                                     | 64.85%         |
| #Obs                | 18              | 50               | 48              | 46               | 40              | 116                           | 86                         |                                     | 202            |

3. 01/2016–02/2020

|                     |         |         |         |        |         |        |        |        |        |
|---------------------|---------|---------|---------|--------|---------|--------|--------|--------|--------|
| Mean                | −1.165  | 2.488 b | −0.923  | 0.116  | 2.221 c | 0.497  | 1.119  | 0.621  | 0.766  |
| T-Statistic         | (−0.62) | (2.34)  | (−0.73) | (0.13) | (1.82)  | (0.65) | (1.50) | (0.58) | (1.42) |
| Welch F-test        |         |         |         |        |         |        |        | (0.34) |        |
| Percentage positive | 47.06%  | 68.09%  | 34.78%  | 50.00% | 65.00%  | 50.91% | 57.14% |        | 53.61% |
| #Obs                | 17      | 47      | 46      | 44     | 40      | 110    | 84     |        | 194    |

**Panel D: Google.**

|                     | <b>First<br/>Monday</b> | <b>Second<br/>Monday</b> | <b>Third<br/>Monday</b> | <b>Fourth<br/>Monday</b> | <b>Fifth<br/>Monday</b> | <b>First<br/>Three<br/>Mondays</b> | <b>Last<br/>Two<br/>Mondays</b> | <b>Difference<br/>In the<br/>Two<br/>Periods</b> | <b>All<br/>Mondays</b> |
|---------------------|-------------------------|--------------------------|-------------------------|--------------------------|-------------------------|------------------------------------|---------------------------------|--------------------------------------------------|------------------------|
| 1.08/2011–02/2020   |                         |                          |                         |                          |                         |                                    |                                 |                                                  |                        |
| Mean                | 5.013 a                 | 3.096 a                  | −0.332                  | 3.414 a                  | 3.562 a                 | 1.970 a                            | 3.484 a                         | 1.514c                                           | 2.626 a                |
| T-Statistic         | (4.67)                  | (5.18)                   | (−0.34)                 | (3.08)                   | (5.22)                  | (3.78)                             | (5.23)                          | (1.81)                                           | (6.33)                 |
| Welch F-test        |                         |                          |                         |                          |                         |                                    |                                 | (3.20)                                           |                        |
| Percentage positive | 80.56%                  | 75.26%                   | 56.84%                  | 60.87%                   | 73.17%                  | 68.42%                             | 66.67%                          |                                                  | 67.66%                 |
| #Obs                | 36                      | 97                       | 95                      | 92                       | 82                      | 228                                | 174                             |                                                  | 402                    |
| 2. 08/2011–12/2015  |                         |                          |                         |                          |                         |                                    |                                 |                                                  |                        |
| Mean                | 5.644 a                 | 2.015 a                  | 0.648                   | 2.311                    | 3.288 a                 | 2.032 a                            | 2.767 a                         | 0.735                                            | 2.350 a                |
| T-Statistic         | (3.77)                  | (4.06)                   | (0.61)                  | (1.59)                   | (4.93)                  | (3.60)                             | (3.32)                          | (0.75)                                           | (4.88)                 |
| Welch F-test        |                         |                          |                         |                          |                         |                                    |                                 | (0.53)                                           |                        |
| Percentage positive | 78.95%                  | 76.00%                   | 61.22%                  | 60.42%                   | 76.19%                  | 70.34%                             | 67.78%                          |                                                  | 69.23%                 |
| #Obs                | 19                      | 50                       | 49                      | 48                       | 42                      | 118                                | 90                              |                                                  | 208                    |
| 3. 01/2016–02/2020  |                         |                          |                         |                          |                         |                                    |                                 |                                                  |                        |
| Mean                | 4.307 b                 | 4.247 a                  | −1.376                  | 4.619 a                  | 3.850 a                 | 1.905 b                            | 4.252 a                         | 2.348c                                           | 2.921 a                |
| T-Statistic         | (2.74)                  | (3.87)                   | (−0.84)                 | (2.74)                   | (3.16)                  | (2.12)                             | (4.05)                          | (1.70)                                           | (4.25)                 |
| Welch F-test        |                         |                          |                         |                          |                         |                                    |                                 | (2.88)                                           |                        |
| Percentage positive | 82.35%                  | 74.47%                   | 52.17%                  | 61.36%                   | 70.00%                  | 66.36%                             | 65.48%                          |                                                  | 65.98%                 |
| #Obs                | 17                      | 47                       | 46                      | 44                       | 40                      | 110                                | 84                              |                                                  | 194                    |

**Panel E: IBM.**

|                     | <b>First<br/>Monday</b> | <b>Second<br/>Monday</b> | <b>Third<br/>Monday</b> | <b>Fourth<br/>Monday</b> | <b>Fifth<br/>Monday</b> | <b>First<br/>Three<br/>Mondays</b> | <b>Last<br/>Two<br/>Mondays</b> | <b>Difference<br/>In the Two<br/>Periods</b> | <b>All<br/>Monday<br/>s</b> |
|---------------------|-------------------------|--------------------------|-------------------------|--------------------------|-------------------------|------------------------------------|---------------------------------|----------------------------------------------|-----------------------------|
| 1.08/2011–02/2020   |                         |                          |                         |                          |                         |                                    |                                 |                                              |                             |
| Mean                | 1.749 c                 | 2.260 a                  | 1.213                   | −0.395                   | 3.438 a                 | 1.743 a                            | 1.411 a                         | −0.332                                       | 1.599 a                     |
| T-Statistic         | (1.65)                  | (4.42)                   | (1.54)                  | (−0.58)                  | (5.43)                  | (4.07)                             | (2.90)                          | (−0.51)                                      | (4.98)                      |
| Welch F-test        |                         |                          |                         |                          |                         |                                    |                                 | (−0.26)                                      |                             |
| Percentage positive | 72.22%                  | 70.10%                   | 57.89%                  | 45.65%                   | 78.05%                  | 65.35%                             | 60.92%                          |                                              | 63.43%                      |
| #Obs                | 36                      | 97                       | 95                      | 92                       | 82                      | 228                                | 174                             |                                              | 402                         |
| 2. 08/2011–12/2015  |                         |                          |                         |                          |                         |                                    |                                 |                                              |                             |
| Mean                | 4.184a                  | 2.004 a                  | 0.554                   | 0.263                    | 3.458 a                 | 1.753 a                            | 1.754 b                         | 0.001                                        | 1.753 a                     |
| T-Statistic         | (4.69)                  | (4.38)                   | (0.51)                  | (0.26)                   | (3.83)                  | (3.39)                             | (2.52)                          | (0.001)                                      | (4.18)                      |

|                     |         |         |        |         |         |         |        |         |         |
|---------------------|---------|---------|--------|---------|---------|---------|--------|---------|---------|
| Welch F-test        |         |         |        |         |         |         |        | (0.00)  |         |
| Percentage positive | 89.47%  | 74.00%  | 63.27% | 47.92%  | 80.95%  | 72.03%  | 63.33% |         | 68.27%  |
| #Obs                | 19      | 50      | 49     | 48      | 42      | 118     | 90     |         | 208     |
| 3. 01/2016–02/2020  |         |         |        |         |         |         |        |         |         |
| Mean                | −0.972  | 2.531 a | 1.914  | −1.113  | 3.417 a | 1.732 b | 1.044  | −0.688  | 1.434 a |
| T-Statistic         | (−0.53) | (2.69)  | (1.65) | (−1.23) | (3.79)  | (2.50)  | (1.53) | (−0.70) | (1.43)  |
| Welch F-test        |         |         |        |         |         |         |        | (−0.48) |         |
| Percentage positive | 52.94%  | 65.96%  | 52.17% | 43.18%  | 75.00%  | 58.18%  | 58.33% | −0.48   | 58.25%  |
| #Obs                | 17      | 47      | 46     | 44      | 40      | 110     | 84     |         | 194     |

**Panel F: VXD.**

|                     | First<br>Monday | Second<br>Monday | Third<br>Monday | Fourth<br>Monday | Fifth<br>Monday | First<br>Three<br>Monday<br>s | Last<br>Two<br>Monday<br>s | Difference<br>In the Two<br>Periods | All<br>Monday<br>s |
|---------------------|-----------------|------------------|-----------------|------------------|-----------------|-------------------------------|----------------------------|-------------------------------------|--------------------|
| 1.10/2013–02/2020   |                 |                  |                 |                  |                 |                               |                            |                                     |                    |
| Mean                | 2.156 c         | 2.763 a          | −1.228          | 0.973            | 3.917 a         | 1.006 c                       | 2.366 a                    | 1.36                                | 1.596 a            |
| T-Statistic         | (1.78)          | (3.13)           | (−1.24)         | (1.01)           | (4.14)          | (1.67)                        | (3.45)                     | (1.49)                              | (3.52)             |
| Welch F-test        |                 |                  |                 |                  |                 |                               |                            | (2.22)                              |                    |
| Percentage positive | 57.14%          | 66.67%           | 36.62%          | 59.42%           | 69.35%          | 52.63%                        | 64.12%                     |                                     | 57.62%             |
| #Obs                | 28              | 72               | 71              | 69               | 62              | 171                           | 131                        |                                     | 302                |
| 2. 10/2013–12/2016  |                 |                  |                 |                  |                 |                               |                            |                                     |                    |
| Mean                | 4.203 c         | 3.243 b          | −1.755          | −0.343           | 4.323 b         | 1.368                         | 1.841                      | 0.474                               | 1.574 b            |
| T-Statistic         | (2.01)          | (2.37)           | (−1.25)         | (−0.27)          | (2.53)          | (1.46)                        | (1.68)                     | (0.33)                              | (2.22)             |
| Welch F-test        |                 |                  |                 |                  |                 |                               |                            | (0.11)                              |                    |
| Percentage positive | 72.73%          | 72.00%           | 44.00%          | 48.00%           | 72.73%          | 60.66%                        | 59.57%                     |                                     | 60.19%             |
| #Obs                | 11              | 25               | 25              | 25               | 22              | 61                            | 47                         |                                     | 108                |
| 3. 01/2017–02/2020  |                 |                  |                 |                  |                 |                               |                            |                                     |                    |
| Mean                | 0.831           | 2.507 b          | −0.942          | 1.72             | 3.693 a         | 0.806                         | 2.660 a                    | 1.854                               | 1.608 a            |
| T-Statistic         | (0.59)          | (2.18)           | (−0.71)         | (1.31)           | (3.23)          | (1.03)                        | (3.03)                     | (1.57)                              | (2.74)             |
| Welch F-test        |                 |                  |                 |                  |                 |                               |                            | (2.49)                              |                    |
| Percentage positive | 47.06%          | 63.83%           | 32.61%          | 65.91%           | 67.50%          | 48.18%                        | 66.67%                     |                                     | 56.19%             |
| #Obs                | 17              | 47               | 46              | 44               | 40              | 110                           | 84                         |                                     | 194                |

**Panel G: VNX.**

|                   | First<br>Monday | Second<br>Monday | Third<br>Monday | Fourth<br>Monday | Fifth<br>Monday | First<br>Three<br>Monday<br>s | Last<br>Two<br>Monday<br>s | Difference<br>In the Two<br>Periods | All<br>Monday<br>s |
|-------------------|-----------------|------------------|-----------------|------------------|-----------------|-------------------------------|----------------------------|-------------------------------------|--------------------|
| 1.10/2000–02/2020 |                 |                  |                 |                  |                 |                               |                            |                                     |                    |
| Mean              | 2.286 a         | 2.475 a          | 0.387           | 0.512            | 3.256 a         | 1.571 a                       | 1.818 a                    | 0.247                               | 1.678 a            |
| T-Statistic       | (3.77)          | (5.24)           | (0.84)          | (1.07)           | (7.00)          | (5.30)                        | (5.32)                     | (0.55)                              | (7.50)             |
| Welch F-test      |                 |                  |                 |                  |                 |                               |                            | (0.30)                              |                    |

|                     |         |         |        |         |         |         |         |        |         |
|---------------------|---------|---------|--------|---------|---------|---------|---------|--------|---------|
| Percentage positive | 66.27%  | 65.28%  | 49.30% | 50.00%  | 70.05%  | 58.75%  | 59.54%  |        | 59.10%  |
| #Obs                | 83      | 216     | 215    | 206     | 187     | 514     | 393     |        | 907     |
| 2. 10/2000–12/2010  |         |         |        |         |         |         |         |        |         |
| Mean                | 2.224 a | 1.607 a | 0.617  | −0.454  | 2.511 a | 1.292 a | 0.964 b | −0.328 | 1.149 a |
| T-Statistic         | (3.00)  | (3.69)  | (1.34) | (−1.01) | (4.29)  | (4.41)  | (2.54)  | (0.70) | (4.92)  |
| Welch F-test        |         |         |        |         |         |         |         | (0.47) |         |
| Percentage positive | 70.45%  | 68.75%  | 50.44% | 44.44%  | 65.66%  | 61.34%  | 54.59%  |        | 58.40%  |
| #Obs                | 44      | 112     | 113    | 108     | 99      | 269     | 207     |        | 476     |
| 3. 01/2011–02/2020  |         |         |        |         |         |         |         |        |         |
| Mean                | 2.357 b | 3.410 a | 0.132  | 1.577 c | 4.095 a | 1.878 a | 2.768 a | 0.89   | 2.262 a |
| T-Statistic         | (2.37)  | (3.99)  | (0.16) | (1.82)  | (5.60)  | (3.53)  | (4.79)  | (1.12) | (5.77)  |
| Welch F-test        |         |         |        |         |         |         |         | (1.28) |         |
| Percentage positive | 61.54%  | 61.54%  | 48.04% | 56.12%  | 75.00%  | 55.92%  | 65.05%  |        | 59.86%  |
| #Obs                | 39      | 104     | 102    | 98      | 88      | 245     | 186     |        | 431     |

**Panel H: RVX.**

|                     | <b>First<br/>Monday</b> | <b>Second<br/>Monday</b> | <b>Third<br/>Monday</b> | <b>Fourth<br/>Monday</b> | <b>Fifth<br/>Monday</b> | <b>First<br/>Three<br/>Mondays</b> | <b>Last<br/>Two<br/>Monday<br/>s</b> | <b>Difference<br/>In the Two<br/>Periods</b> | <b>All<br/>Monday<br/>s</b> |
|---------------------|-------------------------|--------------------------|-------------------------|--------------------------|-------------------------|------------------------------------|--------------------------------------|----------------------------------------------|-----------------------------|
| 1.08/2011–02/2020   |                         |                          |                         |                          |                         |                                    |                                      |                                              |                             |
| Mean                | 2.855 a                 | 2.562 a                  | −0.494                  | 1.936 a                  | 3.656 a                 | 1.327 b                            | 2.746 a                              | 1.420c                                       | 1.940 a                     |
| T-Statistic         | (2.73)                  | (2.83)                   | (−0.62)                 | (2.65)                   | (3.66)                  | (2.45)                             | (5.25)                               | (1.84)                                       | (5.06)                      |
| Welch F-test        |                         |                          |                         |                          |                         |                                    |                                      | (3.55)                                       |                             |
| Percentage positive | 63.89%                  | 58.76%                   | 45.83%                  | 60.87%                   | 75.61%                  | 54.15%                             | 67.82%                               |                                              | 60.05%                      |
| #Obs                | 36                      | 97                       | 96                      | 92                       | 82                      | 229                                | 174                                  |                                              | 403                         |
| 2. 08/2011–12/2015  |                         |                          |                         |                          |                         |                                    |                                      |                                              |                             |
| Mean                | 3.247 b                 | 1.873 b                  | 0.203                   | 1.377                    | 3.986 a                 | 1.390 b                            | 2.594 a                              | 1.204                                        | 1.909 a                     |
| T-Statistic         | (2.38)                  | (2.63)                   | (0.20)                  | (1.30)                   | (3.64)                  | (2.46)                             | (3.36)                               | (1.29)                                       | (4.13)                      |
| Welch F-test        |                         |                          |                         |                          |                         |                                    |                                      | (1.59)                                       |                             |
| Percentage positive | 63.16%                  | 54.00%                   | 52.00%                  | 58.33%                   | 76.19%                  | 54.62%                             | 66.67%                               |                                              | 59.81%                      |
| #Obs                | 19                      | 50                       | 50                      | 48                       | 42                      | 119                                | 90                                   |                                              | 209                         |
| 3. 01/2016–02/2020  |                         |                          |                         |                          |                         |                                    |                                      |                                              |                             |
| Mean                | 2.417                   | 3.294 c                  | −1.252                  | 2.546 b                  | 3.310 a                 | 1.258                              | 2.910 a                              | 1.652                                        | 1.973 a                     |
| T-Statistic         | (1.47)                  | (1.92)                   | (−0.99)                 | (2.55)                   | (3.30)                  | (1.32)                             | (4.12)                               | (1.32)                                       | (3.17)                      |
| Welch F-test        |                         |                          |                         |                          |                         |                                    |                                      | (1.94)                                       |                             |
| Percentage positive | 64.71%                  | 63.83%                   | 39.13%                  | 63.64%                   | 75.00%                  | 53.64%                             | 69.05%                               |                                              | 60.31%                      |
| #Obs                | 17                      | 47                       | 46                      | 44                       | 40                      | 110                                | 84                                   |                                              | 194                         |

Panel I: TYVIX.

|                     | First<br>Monday | Second<br>Monday | Third<br>Monday | Fourth<br>Monday | Fifth<br>Monday | First<br>Three<br>Mondays | Last<br>Two<br>Mondays | Difference<br>In the Two<br>Periods | All<br>Mondays |
|---------------------|-----------------|------------------|-----------------|------------------|-----------------|---------------------------|------------------------|-------------------------------------|----------------|
| 1. 05/2013–02/2020  |                 |                  |                 |                  |                 |                           |                        |                                     |                |
| Mean                | 2.755 b         | 1.870 a          | 2.067a          | 1.783 a          | 2.789 a         | 2.098 a                   | 2.261 a                | 0.163                               | 2.169a         |
| T-Statistic         | (2.22)          | (3.61)           | (4.19)          | (3.29)           | (4.76)          | (5.82)                    | (5.66)                 | (0.30)                              | (8.11)         |
| Welch F-test        |                 |                  |                 |                  |                 |                           |                        | (0.09)                              |                |
| Percentage positive | 73.33%          | 71.05%           | 72.00%          | 68.49%           | 67.69%          | 71.82%                    | 68.12%                 |                                     | 70.22%         |
| #Obs                | 30              | 76               | 75              | 73               | 65              | 181                       | 138                    |                                     | 319            |
| 2. 05/2013–12/2016  |                 |                  |                 |                  |                 |                           |                        |                                     |                |
| Mean                | 4.945 b         | 1.659 b          | 2.700 a         | 1.367 b          | 2.467 a         | 2.675 a                   | 1.880 a                | −0.794                              | 2.326 a        |
| T-Statistic         | (2.79)          | (2.34)           | (3.90)          | (2.29)           | (3.46)          | (5.14)                    | (4.07)                 | (1.11)                              | (6.54)         |
| Welch F-test        |                 |                  |                 |                  |                 |                           |                        | (1.30)                              |                |
| Percentage positive | 82.35%          | 69.23%           | 75.00%          | 60.00%           | 65.71%          | 73.96%                    | 62.67%                 |                                     | 69.01%         |
| #Obs                | 17              | 39               | 40              | 40               | 35              | 96                        | 75                     |                                     | 171            |
| 3. 01/2017–02/2020  |                 |                  |                 |                  |                 |                           |                        |                                     |                |
| Mean                | −0.109          | 2.092 a          | 1.343 c         | 2.287 b          | 3.185 a         | 1.447 a                   | 2.714 a                | 1.267                               | 1.987 a        |
| T-Statistic         | (−0.08)         | (2.73)           | (1.95)          | (2.38)           | (3.28)          | (2.97)                    | (3.99)                 | (1.55)                              | (4.91)         |
| Welch F-test        |                 |                  |                 |                  |                 |                           |                        | (2.29)                              |                |
| Percentage positive | 61.54%          | 72.97%           | 68.57%          | 78.79%           | 70.00%          | 69.41%                    | 74.60%                 |                                     | 71.62%         |
| #Obs                | 13              | 37               | 35              | 33               | 30              | 85                        | 63                     |                                     | 148            |

Notes: “a”, “b”, and “c” indicate the statistical significance at the 1%, 5%, and 10% levels, respectively.

**Table S2.** Summary statistics for the Friday returns categorized by week (continuation of Table 6).

Panel B: Apple.

|                     | First<br>Friday | Second<br>Friday | Third<br>Friday | Fourth<br>Friday | Fifth<br>Friday | First<br>Three<br>Fridays | Last<br>Two<br>Fridays | Difference<br>In the Two<br>Periods | All<br>Fridays |
|---------------------|-----------------|------------------|-----------------|------------------|-----------------|---------------------------|------------------------|-------------------------------------|----------------|
| 1. 08/2011–02/2020  |                 |                  |                 |                  |                 |                           |                        |                                     |                |
| Mean                |                 |                  |                 |                  |                 |                           |                        |                                     |                |
| T-Statistic         | −2.626 c        | 0.185            | −0.036          | 0.904            | 0.711           | −0.384                    | 0.812 c                |                                     | 0.145          |
| Welch F-test        | (−1.95)         | (0.30)           | (−0.07)         | (1.27)           | (1.13)          | (−0.93)                   | (1.70)                 | 1.196b                              | (0.46)         |
| Percentage negative |                 |                  |                 |                  |                 |                           |                        | (2.11)                              |                |
| #Obs                | 63.41%          | 53.00%           | 57.43%          | 52.48%           | 47.25%          | 56.61%                    | 50.00%                 | (2.11)                              | 53.69%         |
|                     | 41              | 100              | 101             | 101              | 91              | 242                       | 192                    |                                     | 434            |
| 2. 08/2011–12/2015  |                 |                  |                 |                  |                 |                           |                        |                                     |                |
| Mean                |                 |                  |                 |                  |                 |                           |                        |                                     |                |
| T-Statistic         | 1.351           | −0.449           | 1.193           | 1.313            | 0.453           | 0.539                     | 0.900                  | 0.361                               | 0.703 c        |
| Welch F-test        | (1.02)          | (−0.63)          | (1.59)          | (1.28)           | (0.54)          | (1.11)                    | (1.35)                 | (0.67)                              | (1.75)         |
| Percentage negative |                 |                  |                 |                  |                 |                           |                        | (0.66)                              |                |
| #Obs                | 42.11%          | 58.00%           | 46.15%          | 48.08%           | 43.75%          | 50.41%                    | 46.00%                 |                                     | 48.42%         |
|                     | 19              | 50               | 52              | 52               | 48              | 121                       | 100                    |                                     | 221            |

|                     |         |        |         |        |        |          |        |        |         |
|---------------------|---------|--------|---------|--------|--------|----------|--------|--------|---------|
| 3. 01/2016–02/2020  |         |        |         |        |        |          |        |        |         |
| Mean                | –6.059a | 0.818  | –1.340c | 0.469  | 0.999  | –1.307 c | 0.717  |        | 1.943 b |
| T-Statistic         | (–3.06) | (0.82) | (–1.77) | (0.47) | (1.04) | (–1.98)  | (1.04) | 2.024b | (2.51)  |
| Welch F-test        |         |        |         |        |        |          |        | (2.19) |         |
| Percentage negative | 81.82%  | 48.00% | 69.39%  | 57.14% | 51.16% | 62.81%   | 54.35% | (2.22) | 59.15%  |
| #Obs                | 22      | 50     | 49      | 49     | 43     | 121      | 92     |        | 213     |

**Panel C: Goldman Sachs.**

|                     | <b>First<br/>Friday</b> | <b>Second<br/>Friday</b> | <b>Third<br/>Friday</b> | <b>Fourth<br/>Friday</b> | <b>Fifth<br/>Friday</b> | <b>First<br/>Three<br/>Fridays</b> | <b>Last<br/>Two<br/>Fridays</b> | <b>Difference<br/>In the Two<br/>Periods</b> | <b>All<br/>Fridays</b> |
|---------------------|-------------------------|--------------------------|-------------------------|--------------------------|-------------------------|------------------------------------|---------------------------------|----------------------------------------------|------------------------|
| 1. 10/2011–02/2020  |                         |                          |                         |                          |                         |                                    |                                 |                                              |                        |
| Mean                |                         |                          |                         |                          |                         |                                    |                                 |                                              |                        |
| T-Statistic         | –1.919 b                | –0.814                   | –2.269 a                | 0.092                    | –0.047                  | –1.608 a                           | 0.026                           |                                              | –0.888 a               |
| Welch F-test        | (–2.25)                 | (–1.41)                  | (–3.89)                 | (0.12)                   | (–0.07)                 | (–4.34)                            | (0.05)                          | 1.634b                                       | (–2.95)                |
| Percentage negative |                         |                          |                         |                          |                         |                                    |                                 | (2.29)                                       |                        |
| #Obs                | 72.50%                  | 64.65%                   | 71.00%                  | 61.62%                   | 49.44%                  | 68.62%                             | 55.85%                          | (2.27)                                       | 63.00%                 |
|                     | 40                      | 99                       | 100                     | 99                       | 89                      | 239                                | 188                             |                                              | 427                    |
| 2. 10/2011–12/2015  |                         |                          |                         |                          |                         |                                    |                                 |                                              |                        |
| Mean                |                         |                          |                         |                          |                         |                                    |                                 |                                              |                        |
| T-Statistic         | –1.876                  | –0.998 c                 | –1.480                  | –0.099                   | –0.274                  | –1.341 a                           | –0.183                          | 1.158                                        | –0.822 b               |
| Welch F-test        | (–1.46)                 | (–1.68)                  | (–1.66)                 | (–0.11)                  | (–0.45)                 | (–2.71)                            | (–0.32)                         | (1.11)                                       | (–2.20)                |
| Percentage negative |                         |                          |                         |                          |                         |                                    |                                 | (1.10)                                       |                        |
| #Obs                | 72.22%                  | 67.35%                   | 66.67%                  | 68.00%                   | 47.83%                  | 67.80%                             | 58.33%                          |                                              | 63.55%                 |
|                     | 18                      | 49                       | 51                      | 50                       | 46                      | 118                                | 96                              |                                              | 214                    |
| 3. 01/2016–02/2020  |                         |                          |                         |                          |                         |                                    |                                 |                                              | –0.956                 |
| Mean                | –1.954                  | –0.634                   | –3.09 a                 | 0.288                    | 0.196                   | –1.869 a                           | 0.245                           |                                              | b                      |
| T-Statistic         | (–1.68)                 | (–0.64)                  | (–4.23)                 | (0.25)                   | (0.17)                  | (–3.38)                            | (0.30)                          | 2.114b                                       | (–2.01)                |
| Welch F-test        |                         |                          |                         |                          |                         |                                    |                                 | (2.06)                                       |                        |
| Percentage negative | 72.73%                  | 62.00%                   | 75.51%                  | 55.10%                   | 51.16%                  | 69.42%                             | 53.26%                          | (2.01)                                       | 62.44%                 |
| #Obs                | 22                      | 50                       | 49                      | 49                       | 43                      | 121                                | 92                              |                                              | 213                    |

**Panel D: Google.**

|                     | <b>First<br/>Friday</b> | <b>Second<br/>Friday</b> | <b>Third<br/>Friday</b> | <b>Fourth<br/>Friday</b> | <b>Fifth<br/>Friday</b> | <b>First<br/>Three<br/>Fridays</b> | <b>Last<br/>Two<br/>Fridays</b> | <b>Difference<br/>In the Two<br/>Periods</b> | <b>All<br/>Fridays</b> |
|---------------------|-------------------------|--------------------------|-------------------------|--------------------------|-------------------------|------------------------------------|---------------------------------|----------------------------------------------|------------------------|
| 1. 08/2011–02/2020  |                         |                          |                         |                          |                         |                                    |                                 |                                              |                        |
| Mean                |                         |                          |                         |                          |                         |                                    |                                 |                                              |                        |
| T-Statistic         | –2.196 b                | –0.318                   | –3.40 a                 | –2.163 b                 | –2.819 a                | –1.923 a                           | –2.474 a                        |                                              | –2.167 a               |
| Welch F-test        | (–2.55)                 | (–0.53)                  | (–3.49)                 | (–2.58)                  | (–2.23)                 | (–3.81)                            | (–3.49)                         | –0.551                                       | (–5.15)                |
| Percentage negative |                         |                          |                         |                          |                         |                                    |                                 | (0.92)                                       |                        |
| #Obs                | 68.29%                  | 60.00%                   | 66.34%                  | 63.37%                   | 61.54%                  | 64.05%                             | 62.50%                          | (0.89)                                       | 63.36%                 |
|                     | 41                      | 100                      | 101                     | 101                      | 91                      | 242                                | 192                             |                                              | 434                    |
| 2. 08/2011–12/2015  |                         |                          |                         |                          |                         |                                    |                                 |                                              |                        |
| Mean                | –0.759                  | –0.325                   | –2.832 b                | –3.962 a                 | –1.908 c                | –1.471 b                           | –2.976 a                        | –1.505 c                                     | –2.152 a               |
| T-Statistic         | (–0.82)                 | (–0.40)                  | (–2.04)                 | (–2.65)                  | (–1.92)                 | (–2.09)                            | (–3.26)                         | (1.78)                                       | (–3.80)                |

|                     |          |         |          |         |          |          |          |        |          |
|---------------------|----------|---------|----------|---------|----------|----------|----------|--------|----------|
| Welch F-test        |          |         |          |         |          |          |          | (1.75) |          |
| Percentage negative | 47.37%   | 60.00%  | 55.77%   | 73.08%  | 56.25%   | 56.20%   | 65.00%   |        | 60.18%   |
| #Obs                | 19       | 50      | 52       | 52      | 48       | 121      | 100      |        | 221      |
|                     |          |         |          |         |          |          |          |        |          |
| 3. 01/2016–02/2020  |          |         |          |         |          |          |          |        |          |
| Mean                | −3.438 b | −0.311  | −4.003 a | −0.254  | −3.837 c | −2.375 a | −1.929 c |        | −2.182 a |
| T-Statistic         | (−2.53)  | (−0.34) | (−2.92)  | (−0.22) | (−2.01)  | (−3.28)  | (−1.76)  | 0.446  | (−3.48)  |
| Welch F-test        |          |         |          |         |          |          |          | (0.46) |          |
| Percentage negative | 86.36%   | 60.00%  | 77.55%   | 53.06%  | 67.44%   | 71.90%   | 59.78%   | (0.44) | 66.67%   |
| #Obs                | 22       | 50      | 49       | 49      | 43       | 121      | 92       |        | 213      |

**Panel E: IBM.**

|                     | <b>First<br/>Friday</b> | <b>Second<br/>Friday</b> | <b>Third<br/>Friday</b> | <b>Fourth<br/>Friday</b> | <b>Fifth<br/>Friday</b> | <b>First<br/>Three<br/>Fridays</b> | <b>Last<br/>Two<br/>Fridays</b> | <b>Difference<br/>In the Two<br/>Periods</b> | <b>All<br/>Fridays</b> |
|---------------------|-------------------------|--------------------------|-------------------------|--------------------------|-------------------------|------------------------------------|---------------------------------|----------------------------------------------|------------------------|
| 1. 08/2011–02/2020  |                         |                          |                         |                          |                         |                                    |                                 |                                              |                        |
| Mean                |                         |                          |                         |                          |                         |                                    |                                 |                                              |                        |
| T-Statistic         | −1.041                  | −0.089                   | −0.963                  | −2.592 b                 | 0.593                   | −0.615c                            | −1.082                          | −0.467                                       | −0.822 b               |
| Welch F-test        | (−1.32)                 | (−0.19)                  | (−1.66)                 | (−2.27)                  | (1.11)                  | (−1.81)                            | (−1.64)                         | (−0.82)                                      | (−2.37)                |
| Percentage negative |                         |                          |                         |                          |                         |                                    |                                 | (−0.79)                                      |                        |
| #Obs                | 63.41%                  | 57.00%                   | 57.43%                  | 57.43%                   | 46.15%                  | 58.26%                             | 52.08%                          |                                              | 55.53%                 |
|                     | 41                      | 100                      | 101                     | 101                      | 91                      | 242                                | 192                             |                                              | 434                    |
|                     |                         |                          |                         |                          |                         |                                    |                                 |                                              |                        |
| 2. 08/2011–12/2015  |                         |                          |                         |                          |                         |                                    |                                 |                                              |                        |
| Mean                |                         |                          |                         |                          |                         |                                    |                                 |                                              |                        |
| T-Statistic         | −1.047                  | −0.979                   | −0.348                  | −2.417 c                 | 0.426                   | −0.718                             | −1.053                          | −0.335                                       | −0.869 b               |
| Welch F-test        | (−0.82)                 | (−1.54)                  | (−0.41)                 | (−1.89)                  | (0.68)                  | (−1.47)                            | (−1.42)                         | (−0.49)                                      | (−2.03)                |
| Percentage negative |                         |                          |                         |                          |                         |                                    |                                 | (−0.49)                                      |                        |
| #Obs                | 57.89%                  | 64.00%                   | 57.69%                  | 61.54%                   | 43.75%                  | 60.33%                             | 53.00%                          |                                              | 57.01%                 |
|                     | 19                      | 50                       | 52                      | 52                       | 48                      | 121                                | 100                             |                                              | 221                    |
|                     |                         |                          |                         |                          |                         |                                    |                                 |                                              |                        |
| 3. 01/2016–02/2020  |                         |                          |                         |                          |                         |                                    |                                 |                                              |                        |
| Mean                | −1.036                  | 0.799                    | −1.615 b                | −2.776                   | 0.779                   | −0.512                             | −1.114                          |                                              | −0.772                 |
| T-Statistic         | (0.32)                  | (1.16)                   | (−2.07)                 | (−1.44)                  | (0.87)                  | (−1.09)                            | (−0.99)                         | −0.602                                       | (−1.40)                |
| Welch F-test        |                         |                          |                         |                          |                         |                                    |                                 | (−0.65)                                      |                        |
| Percentage negative | 68.18%                  | 50.00%                   | 57.14%                  | 53.06%                   | 48.84%                  | 56.20%                             | 51.09%                          | (−0.61)                                      | 53.99%                 |
| #Obs                | 22                      | 50                       | 49                      | 49                       | 43                      | 121                                | 92                              |                                              | 213                    |

**Panel F: VXD.**

|                     | <b>First<br/>Friday</b> | <b>Second<br/>Friday</b> | <b>Third<br/>Friday</b> | <b>Fourth<br/>Friday</b> | <b>Fifth<br/>Friday</b> | <b>First<br/>Three<br/>Fridays</b> | <b>Last<br/>Two<br/>Fridays</b> | <b>Difference<br/>In the Two<br/>Periods</b> | <b>All<br/>Fridays</b> |
|---------------------|-------------------------|--------------------------|-------------------------|--------------------------|-------------------------|------------------------------------|---------------------------------|----------------------------------------------|------------------------|
| 1. 10/2013–02/2020  |                         |                          |                         |                          |                         |                                    |                                 |                                              |                        |
| Mean                |                         |                          |                         |                          |                         |                                    |                                 |                                              |                        |
| T-Statistic         | −0.701                  | 1.575c                   | 0.409                   | −0.920                   | −1.645 b                | 0.704                              | −1.263 b                        | −1.967 a                                     | −0.161                 |
| Welch F-test        | (−0.79)                 | (1.92)                   | (0.49)                  | (−1.23)                  | (−2.29)                 | (1.39)                             | (−2.43)                         | (−2.74)                                      | (−0.44)                |
| Percentage negative |                         |                          |                         |                          |                         |                                    |                                 | (−2.76)                                      |                        |
| #Obs                | 45.16%                  | 44.16%                   | 54.55%                  | 58.44%                   | 68.12%                  | 48.39%                             | 63.01%                          |                                              | 54.65%                 |
|                     | 31                      | 78                       | 77                      | 77                       | 69                      | 186                                | 146                             |                                              | 332                    |

2. 10/2013–12/2016

|                     |        |        |        |         |         |        |         |         |        |
|---------------------|--------|--------|--------|---------|---------|--------|---------|---------|--------|
| Mean                |        |        |        |         |         |        |         |         |        |
| T-Statistic         | 0.152  | 1.291  | 0.692  | −0.761  | −0.948  | 0.851  | −0.849  | −1.70 c | 0.095  |
| Welch F-test        | (0.11) | (1.11) | (0.62) | (−0.76) | (−0.84) | (1.21) | (−1.14) | (−1.70) | (0.18) |
| Percentage negative |        |        |        |         |         |        |         | (−1.71) |        |
| #Obs                | 35.71% | 43.59% | 51.22% | 65.00%  | 61.11%  | 45.26% | 63.16%  |         | 64.91% |
|                     | 14     | 40     | 41     | 40      | 36      | 95     | 76      |         | 171    |

3. 01/2017–02/2020

|                     |         |        |        |         |          |        |          |          |         |
|---------------------|---------|--------|--------|---------|----------|--------|----------|----------|---------|
| Mean                | −1.404  | 1.865  | 0.086  | −1.092  | −2.406 a | 0.551  | −1.711 b |          | −0.433  |
| T-Statistic         | (−1.17) | (1.61) | (0.07) | (−0.96) | (−2.81)  | (0.75) | (−2.37)  | −2.262 b | (−0.82) |
| Welch F-test        |         |        |        |         |          |        |          | (−2.18)  |         |
| Percentage negative | 52.94%  | 44.74% | 58.33% | 51.35%  | 75.76%   | 51.65% | 62.86%   | (−2.22)  | 62.83%  |
| #Obs                | 17      | 38     | 36     | 37      | 33       | 91     | 70       |          | 161     |

Panel G: VXN.

|                     | First<br>Friday | Second<br>Friday | Third<br>Friday | Fourth<br>Friday | Fifth<br>Friday | First<br>Three<br>Fridays | Last<br>Two<br>Fridays | Difference<br>In the Two<br>Periods | All<br>Fridays |
|---------------------|-----------------|------------------|-----------------|------------------|-----------------|---------------------------|------------------------|-------------------------------------|----------------|
| 1. 10/2000–02/2020  |                 |                  |                 |                  |                 |                           |                        |                                     |                |
| Mean                |                 |                  |                 |                  |                 |                           |                        |                                     |                |
| T-Statistic         | −1.873 a        | −0.819 c         | −1.088 a        | −0.032           | 0.267           | −1.112 a                  | 0.011                  |                                     | −0.571 a       |
| Welch F-test        | (−3.53)         | (−1.84)          | (−3.01)         | (−0.07)          | (0.69)          | (−4.38)                   | (0.37)                 | 1.123 a                             | (−2.92)        |
| Percentage negative |                 |                  |                 |                  |                 |                           |                        | (2.90)                              |                |
| #Obs                | 67.74%          | 63.06%           | 67.11%          | 61.43%           | 52.91%          | 65.56%                    | 57.34%                 | (2.89)                              | 61.92%         |
|                     | 93              | 222              | 225             | 223              | 206             | 540                       | 429                    |                                     | 969            |
| 2. 10/2000–12/2010  |                 |                  |                 |                  |                 |                           |                        |                                     |                |
| Mean                |                 |                  |                 |                  |                 |                           |                        |                                     |                |
| T-Statistic         | −1.437 c        | −0.659           | −0.281          | −0.171           | 0.012           | −0.638 b                  | −0.083                 | 0.555                               | −0.390 c       |
| Welch F-test        | (−2.00)         | (−1.26)          | (−0.59)         | (−0.35)          | (0.02)          | (−2.01)                   | (−0.24)                | (0.97)                              | (−1.67)        |
| Percentage negative |                 |                  |                 |                  |                 |                           |                        | (0.97)                              |                |
| #Obs                | 63.27%          | 65.79%           | 60.34%          | 59.48%           | 58.72%          | 63.08%                    | 59.11%                 |                                     | 61.31%         |
|                     | 49              | 114              | 116             | 116              | 109             | 279                       | 225                    |                                     | 504            |
| 3. 01/2011–02/2020  |                 |                  |                 |                  |                 |                           |                        |                                     |                |
| Mean                | −2.358 a        | −0.988           | −1.946 a        | 0.119            | 0.553           | −1.619 a                  | 0.326                  |                                     | −0.766 b       |
| T-Statistic         | (−2.99)         | (−1.35)          | (−3.62)         | (0.15)           | (0.91)          | (−4.06)                   | (0.64)                 | 1.945 a                             | (−2.40)        |
| Welch F-test        |                 |                  |                 |                  |                 |                           |                        | (2.93)                              |                |
| Percentage negative | 72.73%          | 60.19%           | 74.31%          | 63.55%           | 46.39%          | 68.20%                    | 55.39%                 | (2.91)                              | 62.58%         |
| #Obs                | 44              | 108              | 109             | 107              | 97              | 261                       | 204                    |                                     | 465            |

Panel H: RVX.

|                    | First<br>Friday | Second<br>Friday | Third<br>Friday | Fourth<br>Friday | Fifth<br>Friday | First<br>Three<br>Fridays | Last<br>Two<br>Fridays | Difference<br>In the Two<br>Periods | All<br>Fridays |
|--------------------|-----------------|------------------|-----------------|------------------|-----------------|---------------------------|------------------------|-------------------------------------|----------------|
| 1. 08/2011–02/2020 |                 |                  |                 |                  |                 |                           |                        |                                     |                |
| Mean               | −1.475          | −1.739 a         | −1.795 a        | −0.305           | 0.710           | −1.718 a                  | 0.173                  | 1.891a                              | −0.884 a       |
| T-Statistic        | (−1.67)         | (−2.83)          | (−3.63)         | (−0.41)          | (1.25)          | (−4.79)                   | (0.36)                 | (3.18)                              | (−3.01)        |



|                     |         |          |          |         |         |          |         |         |          |
|---------------------|---------|----------|----------|---------|---------|----------|---------|---------|----------|
| Welch F-test        |         |          |          |         |         |          |         | (3.14)  |          |
| Percentage negative | 68.29%  | 67.00%   | 67.33%   | 58.42%  | 42.22%  | 67.36%   | 50.79%  |         | 60.05%   |
| #Obs                | 41      | 100      | 101      | 101     | 90      | 242      | 191     |         | 433      |
| 2. 08/2011–12/2015  |         |          |          |         |         |          |         |         |          |
| Mean                |         |          |          |         |         |          |         |         |          |
| T-Statistic         | -1.093  | -2.598 a | -0.450   | -0.581  | 1.476 c | -1.439 a | 0.406   |         | -0.604   |
| Welch F-test        | (-0.97) | (-3.48)  | (-0.63)  | (-0.59) | (1.98)  | (-3.02)  | (0.64)  | 1.845b  | (-1.55)  |
| Percentage negative |         |          |          |         |         |          |         | (2.29)  |          |
| #Obs                | 63.16%  | 74.00%   | 57.69%   | 59.62%  | 35.42%  | 65.29%   | 48.00%  | (2.27)  | 57.47%   |
|                     | 19      | 50       | 52       | 52      | 48      | 121      | 100     |         | 221      |
| 3. 01/2016–02/2020  |         |          |          |         |         |          |         |         |          |
| Mean                | -1.805  | -0.880   | -3.222 a | -0.012  | -0.166  | -1.997 a | -0.083  |         | -1.175 a |
| T-Statistic         | (-1.33) | (-0.91)  | (-5.21)  | (-0.01) | (-0.19) | (-3.72)  | (-0.12) | 1.914 b | (0.44)   |
| Welch F-test        |         |          |          |         |         |          |         | (2.18)  |          |
| Percentage negative | 72.73%  | 60.00%   | 77.55%   | 57.14%  | 50.00%  | 69.42%   | 53.85%  | (2.15)  | 62.74%   |
| #Obs                | 22      | 50       | 49       | 49      | 42      | 121      | 91      |         | 212      |

**Panel I: TYVIX.**

|                     | <b>First<br/>Friday</b> | <b>Second<br/>Friday</b> | <b>Third<br/>Friday</b> | <b>Fourth<br/>Friday</b> | <b>Fifth<br/>Friday</b> | <b>First<br/>Three<br/>Fridays</b> | <b>Last<br/>Two<br/>Fridays</b> | <b>Difference<br/>In the Two<br/>Periods</b> | <b>All<br/>Fridays</b> |
|---------------------|-------------------------|--------------------------|-------------------------|--------------------------|-------------------------|------------------------------------|---------------------------------|----------------------------------------------|------------------------|
| 1. 05/2013–02/2020  |                         |                          |                         |                          |                         |                                    |                                 |                                              |                        |
| Mean                |                         |                          |                         |                          |                         |                                    |                                 |                                              |                        |
| T-Statistic         | -3.429 a                | -2.853 a                 | -1.347 b                | -0.233                   | 0.231                   | -2.309 a                           | -0.010                          |                                              | -1.288 a               |
| Welch F-test        | (-3.06)                 | (-5.46)                  | (-2.19)                 | (-0.39)                  | (0.37)                  | (-5.99)                            | (-0.02)                         | 2.299a                                       | (-4.40)                |
| Percentage negative |                         |                          |                         |                          |                         |                                    |                                 | (3.96)                                       |                        |
| #Obs                | 76.67%                  | 76.25%                   | 67.50%                  | 58.23%                   | 47.95%                  | 72.63%                             | 53.29%                          | (3.96)                                       | 64.04%                 |
|                     | 30                      | 80                       | 80                      | 79                       | 73                      | 190                                | 152                             |                                              | 342                    |
| 2. 05/2013–12/2016  |                         |                          |                         |                          |                         |                                    |                                 |                                              |                        |
| Mean                |                         |                          |                         |                          |                         |                                    |                                 |                                              |                        |
| T-Statistic         | -4.924 b                | -3.140 a                 | 0.025                   | -0.947                   | 0.129                   | -1.988 a                           | -0.422                          |                                              | -1.274 a               |
| Welch F-test        | (-2.31)                 | (-4.10)                  | (0.03)                  | (-1.31)                  | (0.22)                  | (-3.31)                            | (-0.90)                         | 1.566 b                                      | (-3.23)                |
| Percentage negative |                         |                          |                         |                          |                         |                                    |                                 | (1.99)                                       |                        |
| #Obs                | 84.62%                  | 78.57%                   | 58.14%                  | 64.29%                   | 40.00%                  | 70.41%                             | 52.44%                          | (2.03)                                       | 62.22%                 |
|                     | 13                      | 42                       | 43                      | 42                       | 40                      | 98                                 | 82                              |                                              | 180                    |
| 3. 01/2017–02/2020  |                         |                          |                         |                          |                         |                                    |                                 |                                              |                        |
| Mean                | -2.286 c                | -2.536 a                 | -2.941 a                | 0.578                    | 0.353                   | -2.653                             | 0.472                           |                                              | -1.303 a               |
| T-Statistic         | (-2.07)                 | (-3.58)                  | (-3.71)                 | (0.61)                   | (0.29)                  | (-5.59)                            | (0.63)                          | 3.125a                                       | (-2.98)                |
| Welch F-test        |                         |                          |                         |                          |                         |                                    |                                 | (3.63)                                       |                        |
| Percentage negative | 70.59%                  | 73.68%                   | 78.38%                  | 51.35%                   | 57.58%                  | 75.00%                             | 54.29%                          | (3.53)                                       | 66.05%                 |
| #Obs                | 17                      | 38                       | 37                      | 37                       | 33                      | 92                                 | 70                              |                                              | 162                    |

Notes: “a”, “b”, and “c” indicate the statistical significance at the 1%, 5%, and 10% levels, respectively.

**Table S3.** Changes in the VXAZN on Mondays and Fridays by Year (2011–2020).

**Panel A: VXAPL (2011–2020).**

| Year           | Ratio of      |               | Mean Percent Change of the VIX on |                    | Median Percentage Change of the VIX on |        |
|----------------|---------------|---------------|-----------------------------------|--------------------|----------------------------------------|--------|
|                | “+”<br>Friday | “+”<br>Monday | Friday                            | Monday             | Friday                                 | Monday |
| 2011           | 35.00%        | 64.71%        | –1.66<br>(–1.54)                  | 1.56<br>(1.63)     | –1.29                                  | 0.61   |
| 2012           | 31.37%        | 68.09%        | –3.15 ***<br>(–2.82)              | 1.96 **<br>(2.25)  | –1.57                                  | 2.88   |
| 2013           | 35.29%        | 75.00%        | –2.64 ***<br>(–2.59)              | 2.85 ***<br>(3.44) | –1.27                                  | 3.01   |
| 2014           | 34.00%        | 62.50%        | –2.89 ***<br>(–2.58)              | 2.10 **<br>(2.38)  | –2.13                                  | 1.37   |
| 2015           | 40.82%        | 64.58%        | –2.66<br>(–1.63)                  | 3.39 ***<br>(3.04) | –1.74                                  | 2.08   |
| 2016           | 39.22%        | 52.17%        | –2.92 *<br>(–1.89)                | 0.85<br>(0.52)     | –1.63                                  | 0.88   |
| 2017           | 29.41%        | 65.22%        | –2.80 **<br>(–2.45)               | 0.90<br>(0.42)     | –1.85                                  | 2.74   |
| 2018           | 37.25%        | 60.42%        | –1.95 *<br>(–1.87)                | 2.83 *<br>(1.96)   | –1.23                                  | 1.28   |
| 2019           | 37.25%        | 68.75%        | –2.46 **<br>(–2.39)               | 2.54 **<br>(2.53)  | –1.66                                  | 2.65   |
| 2020           | 55.56%        | 83.33%        | 1.45<br>(0.68)                    | 6.47 *<br>(2.06)   | 0.68                                   | 6.95   |
| <b>Average</b> | 37.52%        | 66.48%        | –2.17                             | 2.54               | –1.37                                  | 2.45   |

Notes: We report the ratio of the positive Fridays and Mondays denoted by “+” Friday and “+” Mondays for the VIX-style estimate of Amazon (VXAZN). We then report the mean of the rate of change in the VIX on Fridays and Mondays in every given year. Finally, we report the median rate of change in the VIX every year for the sample. \*\*\*, \*\*, and \* indicate statistical significance at the 1%, 5%, and 10% levels, respectively. The values in parentheses are the t-statistics.

**Panel B: VXAPL (2011–2020).**

| Year | Ratio of      |               | Mean Percent Change in the VIX on |                    | Median Percentage Change in the VIX on |        |
|------|---------------|---------------|-----------------------------------|--------------------|----------------------------------------|--------|
|      | “+”<br>Friday | “+”<br>Monday | Friday                            | Monday             | Friday                                 | Monday |
| 2011 | 30.00%        | 58.82%        | –1.30<br>(–0.98)                  | 0.55<br>(0.42)     | –2.44                                  | 1.37   |
| 2012 | 37.25%        | 57.45%        | 0.34<br>(0.43)                    | 1.11<br>(1.26)     | –0.83                                  | 2.26   |
| 2013 | 49.02%        | 68.75%        | 0.05<br>(0.08)                    | 2.19 ***<br>(3.06) | –0.28                                  | 2.36   |
| 2014 | 64.00%        | 56.25%        | 1.18 *<br>(1.95)                  | 1.39 *<br>(1.69)   | 0.99                                   | 0.86   |
| 2015 | 61.22%        | 52.08%        | 2.09<br>(1.68)                    | 0.99<br>(0.83)     | 1.36                                   | 0.06   |
| 2016 | 37.25%        | 56.52%        | –0.56                             | 0.59               | –1.89                                  | 1.61   |

|                |               |               |             |             |             |             |
|----------------|---------------|---------------|-------------|-------------|-------------|-------------|
|                |               |               | (-0.75)     | (0.60)      |             |             |
|                |               |               | -0.83       | 0.24        |             |             |
| <b>2017</b>    | 39.22%        | 69.57%        | (-0.89)     | (0.19)      | -0.72       | 2.48        |
|                |               |               | -0.60       | 0.91        |             |             |
| <b>2018</b>    | 45.10%        | 47.92%        | (-0.52)     | (0.69)      | -1.45       | -0.07       |
|                |               |               | -1.06       | 2.39 **     |             |             |
| <b>2019</b>    | 35.29%        | 72.92%        | (-1.16)     | (2.46)      | -1.30       | 1.28        |
|                |               |               | 7.09 *      | 5.05        |             |             |
| <b>2020</b>    | 66.67%        | 83.33%        | (2.21)      | (1.13)      | 9.57        | 4.45        |
| <b>Average</b> | <b>46.50%</b> | <b>62.36%</b> | <b>0.64</b> | <b>1.54</b> | <b>0.30</b> | <b>1.67</b> |

Panel C: VXGSCLS (2011–2020).

| Year           | Ratio of      |               | Mean Percent Change in the VIX on |                    | Median Percentage Change in the VIX on |             |
|----------------|---------------|---------------|-----------------------------------|--------------------|----------------------------------------|-------------|
|                | "+"<br>Friday | "+"<br>Monday | Friday                            | Monday             | Friday                                 | Monday      |
| <b>2011</b>    | 15.38%        | 54.55%        | -4.23 **<br>(-2.44)               | 1.69<br>(0.85)     | -3.55                                  | 0.57        |
| <b>2012</b>    | 41.18%        | 59.57%        | -0.57<br>(-0.94)                  | 1.06<br>(1.66)     | -0.34                                  | 1.01        |
| <b>2013</b>    | 27.45%        | 70.83%        | -1.55 ***<br>(-3.78)              | 2.07 ***<br>(3.79) | -0.98                                  | 2.13        |
| <b>2014</b>    | 36.00%        | 72.92%        | -0.38<br>(-0.59)                  | 1.92 ***<br>(2.67) | -0.80                                  | 1.98        |
| <b>2015</b>    | 40.82%        | 58.33%        | 0.13<br>(0.11)                    | 1.75 *<br>(1.78)   | -0.95                                  | 1.22        |
| <b>2016</b>    | 27.45%        | 60.87%        | -1.71 *<br>(-1.78)                | 1.29<br>(1.66)     | -2.08                                  | 1.19        |
| <b>2017</b>    | 31.37%        | 36.96%        | -2.33 **<br>(-2.58)               | 0.21<br>(0.17)     | -2.36                                  | -1.08       |
| <b>2018</b>    | 45.10%        | 50.00%        | 0.54<br>(0.49)                    | 0.33<br>(0.25)     | -0.70                                  | -0.14       |
| <b>2019</b>    | 36.17%        | 60.47%        | -1.50 **<br>(-2.03)               | 0.76<br>(0.47)     | -1.88                                  | 1.53        |
| <b>2020</b>    | 66.67%        | 83.33%        | 5.73<br>(1.47)                    | 4.55 *<br>(2.19)   | 3.65                                   | 4.36        |
| <b>Average</b> | <b>36.76%</b> | <b>60.78%</b> | <b>-0.59</b>                      | <b>1.56</b>        | <b>-1.00</b>                           | <b>1.28</b> |

Panel D: VXGOG (2011–2020).

| Year        | Ratio of      |               | Mean Percent Change in the VIX on |                    | Median Percentage Change in the VIX on |        |
|-------------|---------------|---------------|-----------------------------------|--------------------|----------------------------------------|--------|
|             | "+"<br>Friday | "+"<br>Monday | Friday                            | Monday             | Friday                                 | Monday |
| <b>2011</b> | 30.00%        | 64.71%        | -3.60 *<br>(-2.04)                | 1.51<br>(1.16)     | -2.77                                  | 1.71   |
| <b>2012</b> | 43.14%        | 63.83%        | -1.61 **<br>(-2.38)               | 1.65 **<br>(2.35)  | -0.44                                  | 1.91   |
| <b>2013</b> | 35.29%        | 77.08%        | -1.85 ***<br>(-2.69)              | 1.97 ***<br>(2.72) | -0.79                                  | 3.04   |
| <b>2014</b> | 44.00%        | 77.08%        | -1.67                             | 2.82 **            | -0.37                                  | 2.82   |

|                |               |               |                      |                   |              |             |
|----------------|---------------|---------------|----------------------|-------------------|--------------|-------------|
|                |               |               | (-1.20)<br>-2.93 *   | (2.61)<br>3.25 ** |              |             |
| <b>2015</b>    | 38.78%        | 60.42%        | (-1.92)<br>-3.32 **  | (2.38)<br>3.12 ** | -1.15        | 1.50        |
| <b>2016</b>    | 25.49%        | 65.22%        | (-2.03)<br>-3.85 *** | (2.29)<br>1.75    | -1.74        | 1.76        |
| <b>2017</b>    | 27.45%        | 67.39%        | (-2.95)<br>-1.57     | (1.10)<br>3.37 ** | -2.55        | 2.54        |
| <b>2018</b>    | 37.25%        | 52.08%        | (-1.66)<br>-1.48     | (2.11)<br>2.73 ** | -1.58        | 0.77        |
| <b>2019</b>    | 37.25%        | 75.00%        | (-1.45)<br>6.24 *    | (2.62)<br>8.36 ** | -1.64        | 2.62        |
| <b>2020</b>    | 66.67%        | 100.00%       | (1.96)               | (3.00)            | 3.03         | 5.59        |
| <b>Average</b> | <b>38.53%</b> | <b>70.28%</b> | <b>-1.56</b>         | <b>3.05</b>       | <b>-1.00</b> | <b>2.43</b> |

Panel E: VXIBM (January 1999–November 2019).

| Year           | Ratio of      |               | Mean Percent Change in the VIX on |                    | Median Percentage Change in the VIX on |             |
|----------------|---------------|---------------|-----------------------------------|--------------------|----------------------------------------|-------------|
|                | "+"<br>Friday | "+"<br>Monday | Friday                            | Monday             | Friday                                 | Monday      |
| <b>2011</b>    | 40.00%        | 52.94%        | -0.97<br>(-0.57)                  | -0.21<br>(-0.13)   | -2.30                                  | 0.20        |
| <b>2012</b>    | 35.29%        | 63.83%        | -1.70 *<br>(-1.98)                | 0.83<br>(1.08)     | -1.24                                  | 1.50        |
| <b>2013</b>    | 49.02%        | 75.00%        | -0.59<br>(-0.93)                  | 1.65 **<br>(2.09)  | 0.00                                   | 1.95        |
| <b>2014</b>    | 42.00%        | 70.83%        | -1.22<br>(-1.04)                  | 1.52 *<br>(1.79)   | -0.94                                  | 1.35        |
| <b>2015</b>    | 38.78%        | 68.75%        | 0.11<br>(0.14)                    | 3.69 ***<br>(3.68) | -0.91                                  | 2.97        |
| <b>2016</b>    | 39.22%        | 63.04%        | 0.07<br>(0.09)                    | 1.53*<br>(1.89)    | -0.96                                  | 1.24        |
| <b>2017</b>    | 43.14%        | 56.52%        | -1.67<br>(-1.81)                  | 0.61<br>(0.72)     | -0.59                                  | 0.97        |
| <b>2018</b>    | 43.14%        | 50.00%        | -0.20<br>(-0.19)                  | 1.48<br>(1.24)     | 0.00                                   | 0.02        |
| <b>2019</b>    | 39.22%        | 62.50%        | -2.46<br>(-1.61)                  | 1.32<br>(1.28)     | -0.78                                  | 1.32        |
| <b>2020</b>    | 88.89%        | 66.67%        | 5.83 **<br>(2.76)                 | 7.55 *<br>(2.18)   | 5.32                                   | 7.39        |
| <b>Average</b> | <b>45.87%</b> | <b>63.01%</b> | <b>-0.28</b>                      | <b>2.00</b>        | <b>-0.24</b>                           | <b>1.89</b> |

Panel F: VXD (2013–2020).

| Year        | Ratio of      |               | Mean Percent change in the VIX on |                | Median Percentage Change in the VIX on |        |
|-------------|---------------|---------------|-----------------------------------|----------------|----------------------------------------|--------|
|             | "+"<br>Friday | "+"<br>Monday | Friday                            | Monday         | Friday                                 | Monday |
| <b>2013</b> | 23.08%        | 83.33%        | -2.31<br>(-0.03)                  | 3.40<br>(1.20) | -2.99                                  | 2.84   |
| <b>2014</b> | 36.00%        | 56.25%        | -0.54<br>(0.43)                   | 1.02<br>(0.89) | -1.46                                  | 0.81   |

|                |               |               |                    |                   |              |             |
|----------------|---------------|---------------|--------------------|-------------------|--------------|-------------|
| <b>2015</b>    | 39.58%        | 58.33%        | 0.76<br>(-0.35)    | 1.67<br>(1.01)    | -0.73        | 1.56        |
| <b>2016</b>    | 39.22%        | 54.35%        | 0.21<br>(0.39)     | 0.76<br>(0.52)    | -1.09        | 1.06        |
| <b>2017</b>    | 38.00%        | 52.17%        | -1.96<br>(-0.32)   | -0.68<br>(-0.07)  | -1.74        | 0.23        |
| <b>2018</b>    | 43.14%        | 56.25%        | -1.21<br>(-0.51)   | 2.89<br>(1.19)    | -2.34        | 0.37        |
| <b>2019</b>    | 33.33%        | 64.58%        | -1.52 *<br>(-1.99) | 2.74 **<br>(2.23) | -2.55        | 1.69        |
| <b>2020</b>    | 88.89%        | 33.33%        | 8.52<br>(1.00)     | 6.39<br>(0.14)    | 8.86         | -1.38       |
| <b>Average</b> | <b>42.65%</b> | <b>57.33%</b> | <b>-0.94</b>       | <b>1.69</b>       | <b>-1.84</b> | <b>1.22</b> |

Panel G: VXN (2000–2020).

| Year           | Ratio of      |               | Mean Percent Change in the<br>VIX on |             | Median Percentage Change in the<br>VIX on |             |
|----------------|---------------|---------------|--------------------------------------|-------------|-------------------------------------------|-------------|
|                | “+”<br>Friday | “+”<br>Monday | Friday                               | Monday      | Friday                                    | Monday      |
| <b>2000</b>    | 100.00%       | 25.00%        | 2.23                                 | -0.95       | 1.85                                      | -1.16       |
| <b>2001</b>    | 46.81%        | 36.96%        | -0.30                                | -0.33       | -0.27                                     | -0.87       |
| <b>2002</b>    | 37.25%        | 50.00%        | -0.84                                | -0.47       | -1.05                                     | 0.11        |
| <b>2003</b>    | 36.00%        | 50.00%        | -1.03                                | -0.10       | -0.71                                     | 0.08        |
| <b>2004</b>    | 32.00%        | 51.06%        | -0.96                                | 1.37        | -1.29                                     | 0.52        |
| <b>2005</b>    | 29.41%        | 63.04%        | -0.85                                | 1.82        | -1.91                                     | 2.49        |
| <b>2006</b>    | 41.18%        | 71.74%        | 0.00                                 | 2.75        | -0.40                                     | 3.12        |
| <b>2007</b>    | 39.22%        | 75.00%        | -0.19                                | 1.99        | -1.75                                     | 2.49        |
| <b>2008</b>    | 44.00%        | 70.83%        | 0.26                                 | 2.49        | -0.51                                     | 2.69        |
| <b>2009</b>    | 36.73%        | 66.67%        | -0.66                                | 2.09        | -1.75                                     | 1.77        |
| <b>2010</b>    | 36.00%        | 51.06%        | 0.46                                 | 0.08        | -1.64                                     | 0.16        |
| <b>2011</b>    | 43.14%        | 56.52%        | -0.78                                | 1.98        | -1.24                                     | 1.68        |
| <b>2012</b>    | 31.37%        | 59.57%        | -0.87                                | 1.45        | -1.54                                     | 2.36        |
| <b>2013</b>    | 23.53%        | 62.50%        | -2.22                                | 3.10        | -2.53                                     | 1.68        |
| <b>2014</b>    | 40.00%        | 62.50%        | -0.10                                | 1.83        | -1.15                                     | 1.15        |
| <b>2015</b>    | 51.02%        | 58.33%        | 1.00                                 | 2.31        | 0.76                                      | 1.39        |
| <b>2016</b>    | 31.37%        | 54.35%        | -0.50                                | 1.24        | -1.42                                     | 0.81        |
| <b>2017</b>    | 27.45%        | 58.70%        | -1.86                                | 0.53        | -2.82                                     | 1.27        |
| <b>2018</b>    | 39.22%        | 62.50%        | -0.82                                | 3.70        | -1.35                                     | 2.28        |
| <b>2019</b>    | 33.33%        | 64.58%        | -1.94                                | 3.52        | -3.19                                     | 2.86        |
| <b>2020</b>    | 88.89%        | 50.00%        | 6.52                                 | 6.65        | 5.49                                      | 0.42        |
| <b>Average</b> | <b>42.28%</b> | <b>57.19%</b> | <b>-0.16</b>                         | <b>1.76</b> | <b>-0.88</b>                              | <b>1.30</b> |

Panel H: RVX (2011–2020).

| Year        | Ratio of      |               | Mean Percent Change in the<br>VIX on |                | Median Percentage Change in the<br>VIX on |        |
|-------------|---------------|---------------|--------------------------------------|----------------|-------------------------------------------|--------|
|             | “+”<br>Friday | “+”<br>Monday | Friday                               | Monday         | Friday                                    | Monday |
| <b>2011</b> | 36.84%        | 50.00%        | -1.69<br>(-1.15)                     | 1.43<br>(1.02) | -2.31                                     | 0.46   |
| <b>2012</b> | 40.38%        | 60.87%        | -0.90                                | 1.50 *         | -1.06                                     | 1.54   |

|                |               |               |                      |                    |              |             |
|----------------|---------------|---------------|----------------------|--------------------|--------------|-------------|
|                |               |               | (-1.24)              | (1.82)             |              |             |
| 2013           | 37.25%        | 67.35%        | -1.86 ***<br>(-2.95) | 2.70 ***<br>(2.71) | -1.25        | 1.18        |
| 2014           | 38.00%        | 60.42%        | 0.20<br>(0.23)       | 1.55 *<br>(1.91)   | -0.84        | 1.84        |
| 2015           | 53.06%        | 54.17%        | 0.62<br>(0.64)       | 2.03<br>(1.65)     | 0.60         | 0.28        |
| 2016           | 38.00%        | 58.70%        | -0.85<br>(-0.79)     | 0.92<br>(1.13)     | -2.48        | 1.02        |
| 2017           | 33.33%        | 63.04%        | -2.19 ***<br>(-4.14) | 0.58<br>(0.68)     | -2.35        | 1.00        |
| 2018           | 38.46%        | 59.57%        | -0.36<br>(-0.39)     | 3.22 *<br>(1.72)   | -0.96        | 1.51        |
| 2019           | 31.37%        | 61.22%        | -2.22 **<br>(-2.34)  | 2.58 **<br>(2.53)  | -3.25        | 2.28        |
| 2020           | 62.50%        | 50.00%        | 4.63 **<br>(2.70)    | 5.94<br>(0.92)     | 5.90         | -0.98       |
| <b>Average</b> | <b>40.92%</b> | <b>58.53%</b> | <b>-0.46</b>         | <b>2.25</b>        | <b>-0.80</b> | <b>1.01</b> |

Panel I: TYVIX (2013–2020).

| Year           | Ratio of      |               | Mean Percent Change in the VIX on |                    | Median Percentage Change in the VIX on |             |
|----------------|---------------|---------------|-----------------------------------|--------------------|----------------------------------------|-------------|
|                | “+”<br>Friday | “+”<br>Monday | Friday                            | Monday             | Friday                                 | Monday      |
| 2013           | 38.71%        | 63.33%        | -1.72<br>(-1.39)                  | 2.78 **<br>(2.67)  | -1.63                                  | 1.25        |
| 2014           | 40.00%        | 70.83%        | -1.23<br>(-1.52)                  | 1.61 ***<br>(2.86) | -0.75                                  | 1.70        |
| 2015           | 33.33%        | 74.47%        | -1.13 **<br>(-2.12)               | 2.50 ***<br>(4.33) | -1.20                                  | 1.95        |
| 2016           | 33.33%        | 65.22%        | -1.19<br>(-1.63)                  | 2.13 ***<br>(3.23) | -1.61                                  | 2.30        |
| 2017           | 29.41%        | 76.09%        | -2.18 ***<br>(-3.45)              | 1.19 *<br>(1.72)   | -2.08                                  | 2.08        |
| 2018           | 35.29%        | 68.75%        | -1.13<br>(-1.62)                  | 2.03 ***<br>(3.75) | -1.64                                  | 2.12        |
| 2019           | 29.41%        | 70.83%        | -1.64 *<br>(-1.97)                | 2.03 **<br>(2.55)  | -2.99                                  | 1.50        |
| 2020           | 66.67%        | 66.67%        | 4.59<br>(1.58)                    | 3.99<br>(1.29)     | 5.01                                   | 2.34        |
| <b>Average</b> | <b>38.27%</b> | <b>69.52%</b> | <b>-0.70</b>                      | <b>2.28</b>        | <b>-0.86</b>                           | <b>1.90</b> |

Notes: For each VIX index, we report the ratio of the positive Fridays and Mondays denoted by “+” Friday and “+” Mondays. We then report the mean of the rate of change in the VIX on Fridays and Mondays in every given year. Finally, we report the median rate of change in the VIX every year for the sample. \*\*\*, \*\*, and \* indicate statistical significance at the 1%, 5%, and 10% levels, respectively. The values in parentheses are the t-statistics.

**Table S4.** Sign direction of Fridays and Mondays in the Sampled Volatility Indices (two equal subsamples).

**Panel A: Changes in the VXAZN.**

|                                                                   | <b>August 2011:08–2015:12</b> |                      | <b>2016:01–2020:02</b> |                      |
|-------------------------------------------------------------------|-------------------------------|----------------------|------------------------|----------------------|
|                                                                   | <b>Friday</b>                 | <b>Monday</b>        | <b>Friday</b>          | <b>Monday</b>        |
| Number of times the Index advanced                                | 78                            | 140                  | 78                     | 121                  |
| Number of times the Index declined                                | 143                           | 68                   | 133                    | 73                   |
| Number of times the Index was unchanged                           | 0                             | 0                    | 2                      | 0                    |
| <b>Total</b>                                                      | <b>221</b>                    | <b>208</b>           | <b>213</b>             | <b>194</b>           |
| Percentage of times the Index advanced (1)<br>(Sign Test t-stat.) | 35.29% ***<br>(4.37)          | 67.31% ***<br>(4.99) | 36.62% ***<br>(3.63)   | 62.37% ***<br>(3.45) |
| Percentage of times the Index declined (2)                        | 64.71%                        | 32.69%               | 62.44%                 | 37.63%               |
| Difference (2)–(1)<br>(t-stat.)                                   | 29.41% ***<br>(6.45)          | 34.62% ***<br>(7.51) | 25.82% ***<br>(5.50)   | 24.74% ***<br>(4.92) |
| Mean percentage change (t-stat.)                                  | –2.73 ***<br>(–4.81)          | 2.49 ***<br>(5.76)   | –2.36 ***<br>(–4.02)   | 1.94 **<br>(2.51)    |
| Median percentage change                                          | –1.68                         | 2.21                 | –1.44                  | 2.25                 |

**Panel B: Changes in VXAPL.**

|                                                                   | <b>2011:08–2015:12</b> |                      | <b>2016:01–2020:02</b> |                      |
|-------------------------------------------------------------------|------------------------|----------------------|------------------------|----------------------|
|                                                                   | <b>Friday</b>          | <b>Monday</b>        | <b>Friday</b>          | <b>Monday</b>        |
| Number of times the Index advanced                                | 112                    | 122                  | 86                     | 121                  |
| Number of times the Index declined                                | 107                    | 86                   | 126                    | 72                   |
| Number of times the Index was unchanged                           | 2                      | 0                    | 1                      | 1                    |
| <b>Total</b>                                                      | <b>221</b>             | <b>208</b>           | <b>213</b>             | <b>194</b>           |
| Percentage of times the Index advanced (1)<br>(Sign Test t-stat.) | 50.68%<br>(0.20)       | 58.65% ***<br>(2.49) | 40.38% ***<br>(2.67)   | 62.37% ***<br>(3.45) |
| Percentage of times the Index declined (2)                        | 48.42%                 | 41.35%               | 59.15%                 | 37.11%               |
| Difference (2)–(1)<br>(t-stat.)                                   | 2.26%<br>(0.47)        | 17.31% ***<br>(3.58) | 18.78% ***<br>(3.94)   | 25.26% ***<br>(5.13) |
| Mean percentage change (t-stat.)                                  | 0.70 *<br>(1.75)       | 1.35 ***<br>(3.11)   | –0.43<br>(–0.89)       | 1.17 **<br>(2.04)    |
| Median percentage change                                          | 0.15                   | 1.34                 | –1.15                  | 1.55                 |

**Panel C: Changes in the VXGSCLS.**

|                                                                   | <b>2011:10–2015:12</b> |                      | <b>2016:01–2020:02</b> |                  |
|-------------------------------------------------------------------|------------------------|----------------------|------------------------|------------------|
|                                                                   | <b>Friday</b>          | <b>Monday</b>        | <b>Friday</b>          | <b>Monday</b>    |
| Number of times the Index advanced                                | 75                     | 131                  | 79                     | 104              |
| Number of times the Index declined                                | 136                    | 70                   | 133                    | 90               |
| Number of times the Index was unchanged                           | 3                      | 1                    | 1                      | 0                |
| <b>Total</b>                                                      | <b>214</b>             | <b>202</b>           | <b>213</b>             | <b>194</b>       |
| Percentage of times the Index advanced (1)<br>(Sign Test t-stat.) | 35.05% ***<br>(3.97)   | 64.85% ***<br>(4.22) | 37.09% ***<br>(3.63)   | 53.61%<br>(1.01) |
| Percentage of times the Index declined (2)<br>(Sign Test t-stat.) | 63.55%                 | 34.65%               | 62.44%                 | 46.39%           |
| Difference (2)–(1)<br>(t-stat.)                                   | 28.50% ***<br>(6.14)   | 30.20% ***<br>(6.35) | 25.35% ***<br>(5.39)   | 7.22%<br>(1.42)  |
| Mean percentage change (t-stat.)                                  | –0.82 **<br>(–1.75)    | 1.70 ***<br>(3.11)   | –0.96 **<br>(–1.75)    | 0.77<br>(1.42)   |

|                          |         |        |         |        |
|--------------------------|---------|--------|---------|--------|
|                          | (-2.19) | (4.68) | (-2.34) | (1.42) |
| Median percentage change | -0.96   | 1.57   | -1.84   | 0.40   |

**Panel D: Changes in the VXGOG.**

|                                                                               | 2011:08–2015:12                |                                | 2016:01–2020:02                |                                |
|-------------------------------------------------------------------------------|--------------------------------|--------------------------------|--------------------------------|--------------------------------|
|                                                                               | Friday                         | Monday                         | Friday                         | Monday                         |
| Number of times the Index advanced                                            | 87                             | 144                            | 71                             | 128                            |
| Number of times the Index declined                                            | 133                            | 63                             | 142                            | 66                             |
| Number of times the Index was unchanged                                       | 1                              | 1                              | 0                              | 0                              |
| <b>Total</b>                                                                  | <b>221</b>                     | <b>208</b>                     | <b>213</b>                     | <b>194</b>                     |
| Percentage of times the Index advanced (1)<br>(Sign Test t-stat.)             | 39.37% ***<br>(3.03)           | 69.23% ***<br>(5.55)           | 33.33% ***<br>(4.87)           | 65.98% ***<br>(4.45)           |
| Percentage of times the Index declined (2)<br>Difference (2)–(1)<br>(t-stat.) | 60.18%<br>20.81% ***<br>(4.46) | 30.29%<br>38.94% ***<br>(8.60) | 66.67%<br>33.33% ***<br>(7.28) | 34.02%<br>31.96% ***<br>(6.63) |
| Mean percentage change (t-stat.)                                              | -2.15 ***<br>(-3.80)           | 2.35 ***<br>(4.88)             | -2.18 ***<br>(-3.48)           | 2.92 ***<br>(4.25)             |
| Median percentage change                                                      | -0.78                          | 2.50                           | -1.74                          | 2.38                           |

**Panel E: Changes in the VXIBM.**

|                                                                   | 2011:08–2015:12                           |                                | 2016:01–2020:02               |                                |
|-------------------------------------------------------------------|-------------------------------------------|--------------------------------|-------------------------------|--------------------------------|
|                                                                   | Friday                                    | Monday                         | Friday                        | Monday                         |
| Number of times the Index advanced                                | 91                                        | 142                            | 92                            | 113                            |
| Number of times the Index declined                                | 126                                       | 65                             | 115                           | 78                             |
| Number of times the Index was unchanged                           | 4                                         | 1                              | 6                             | 3                              |
| <b>Total</b>                                                      | <b>221</b>                                | <b>208</b>                     | <b>213</b>                    | <b>194</b>                     |
| Percentage of times the Index advanced (1)<br>(Sign Test t-stat.) | 41.18% **<br>(2.09)                       | 68.27% ***<br>(5.27)           | 43.19%<br>(1.17)              | 58.25% ***<br>(2.29)           |
| Percentage of times the Index declined (2)<br>(Sign Test t-stat.) | 57.01%<br>Difference (2)–(1)<br>(t-stat.) | 31.25%<br>37.02% ***<br>(8.11) | 53.99%<br>10.80% **<br>(2.24) | 40.21%<br>18.04% ***<br>(3.60) |
| Mean percentage change (t-stat.)                                  | -0.87 **<br>(-2.03)                       | 1.75 ***<br>(4.18)             | -0.77<br>(-1.39)              | 1.43 ***<br>(2.92)             |
| Median percentage change                                          | -0.74                                     | 1.80                           | -0.45                         | 1.16                           |

**Panel F: Changes in the VXD.**

|                                                                               | 2013:10–2016:12                |                                | 2017:01–2020:02                |                               |
|-------------------------------------------------------------------------------|--------------------------------|--------------------------------|--------------------------------|-------------------------------|
|                                                                               | Friday                         | Monday                         | Friday                         | Monday                        |
| Number of times the Index advanced                                            | 60                             | 90                             | 66                             | 84                            |
| Number of times the Index declined                                            | 101                            | 64                             | 95                             | 64                            |
| Number of times the Index was unchanged                                       | 1                              | 0                              | 0                              | 0                             |
| <b>Total</b>                                                                  | <b>162</b>                     | <b>154</b>                     | <b>161</b>                     | <b>148</b>                    |
| Percentage of times the Index advanced (1)<br>(Sign Test t-stat.)             | 37.04% ***<br>(3.14)           | 58.44% **<br>(2.09)            | 40.99% **<br>(2.20)            | 56.76% *<br>(1.64)            |
| Percentage of times the Index declined (2)<br>Difference (2)–(1)<br>(t-stat.) | 62.35%<br>25.31% ***<br>(3.30) | 41.56%<br>16.88% ***<br>(3.15) | 59.01%<br>18.01% ***<br>(3.21) | 43.24%<br>13.51% **<br>(2.56) |



|                                  |                  |                   |                    |                    |
|----------------------------------|------------------|-------------------|--------------------|--------------------|
| Mean percentage change (t-stat.) | -0.06<br>(-0.09) | 1.33 **<br>(2.22) | -0.99 *<br>(-1.91) | 1.87 ***<br>(2.74) |
| Median percentage change         | -1.31            | 1.27              | -2.02              | 0.86               |

**Panel G: Changes in the VXN.**

|                                                                   | 2000:10–2010:12      |                      | 2011:01–2020:02      |                      |
|-------------------------------------------------------------------|----------------------|----------------------|----------------------|----------------------|
|                                                                   | Friday               | Monday               | Friday               | Monday               |
| Number of times the Index advanced                                | 193                  | 278                  | 170                  | 258                  |
| Number of times the Index declined                                | 309                  | 195                  | 291                  | 171                  |
| Number of times the Index was unchanged                           | 2                    | 3                    | 4                    | 2                    |
| <b>Total</b>                                                      | <b>504</b>           | <b>476</b>           | <b>465</b>           | <b>431</b>           |
| Percentage of times the Index advanced (1)<br>(Sign Test t-stat.) | 38.29% ***<br>(5.08) | 58.40% ***<br>(3.67) | 36.56% ***<br>(5.43) | 59.86% ***<br>(4.09) |
| Percentage of times the Index declined (2)                        | 61.31%               | 40.97%               | 62.58%               | 39.68%               |
| Difference (2)–(1)<br>(t-stat.)                                   | 23.02% ***<br>(7.50) | 17.44% ***<br>(5.46) | 26.02% ***<br>(8.21) | 20.19% ***<br>(6.04) |
| Mean percentage change (t-stat.)                                  | -0.39 *<br>(-1.67)   | 1.15 ***<br>(4.92)   | -0.77* *<br>(-2.40)  | 2.26 ***<br>(5.77)   |
| Median percentage change                                          | -1.04                | 0.93                 | -1.54                | 1.64                 |

**Panel H: Changes in the RVX.**

|                                                                   | 2011:08–2015:12      |                      | 2016:01–2020:02      |                      |
|-------------------------------------------------------------------|----------------------|----------------------|----------------------|----------------------|
|                                                                   | Friday               | Monday               | Friday               | Monday               |
| Number of times the Index advanced                                | 92                   | 125                  | 78                   | 117                  |
| Number of times the Index declined                                | 127                  | 82                   | 133                  | 77                   |
| Number of times the Index was unchanged                           | 2                    | 2                    | 2                    | 0                    |
| <b>Total</b>                                                      | <b>221</b>           | <b>209</b>           | <b>213</b>           | <b>194</b>           |
| Percentage of times the Index advanced (1)<br>(Sign Test t-stat.) | 41.63% **<br>(2.22)  | 59.81% ***<br>(2.84) | 36.62% ***<br>(3.63) | 60.31% ***<br>(2.87) |
| Percentage of times the Index declined (2)                        | 57.47%               | 39.23%               | 62.44%               | 39.69%               |
| Difference (2)–(1)<br>(t-stat.)                                   | 15.84% ***<br>(3.36) | 20.57% ***<br>(4.29) | 25.82% ***<br>(5.50) | 20.62% ***<br>(4.14) |
| Mean percentage change (t-stat.)                                  | -0.60<br>(-1.55)     | 1.91 ***<br>(4.13)   | -1.12 ***<br>(-2.53) | 1.97 ***<br>(3.17)   |
| Median percentage change                                          | -0.99                | 1.21                 | -2.19                | 1.42                 |

**Panel I: Changes in the TYVIX.**

|                                                                   | 2013:05–2016:12      |                      | 2017:01–2020:02      |                      |
|-------------------------------------------------------------------|----------------------|----------------------|----------------------|----------------------|
|                                                                   | Friday               | Monday               | Friday               | Monday               |
| Number of times the Index advanced                                | 65                   | 118                  | 54                   | 106                  |
| Number of times the Index declined                                | 112                  | 49                   | 107                  | 39                   |
| Number of times the Index was unchanged                           | 3                    | 4                    | 1                    | 3                    |
| <b>Total</b>                                                      | <b>180</b>           | <b>171</b>           | <b>162</b>           | <b>148</b>           |
| Percentage of times the Index advanced (1)<br>(Sign Test t-stat.) | 36.11% ***<br>(3.28) | 69.01% ***<br>(4.97) | 33.33% ***<br>(4.09) | 71.62% ***<br>(5.26) |
| Percentage of times the Index declined (2)<br>(Sign Test t-stat.) | 62.22%               | 28.65%               | 66.05%               | 26.35%               |
| Difference (2)–(1)                                                | 26.11% ***           | 40.35% ***           | 32.72% ***           | 45.27% ***           |

|                                  |           |          |           |          |
|----------------------------------|-----------|----------|-----------|----------|
| (t-stat.)                        | (5.12)    | (8.13)   | (6.21)    | (8.71)   |
| Mean percentage change (t-stat.) | -1.27 *** | 2.20 *** | -1.30 *** | 1.85 *** |
| Median percentage change         | (-3.23)   | (6.52)   | (-2.98)   | (4.66)   |
|                                  | -1.44     | 1.82     | -2.13     | 1.88     |

Notes: The table illustrates the behaviour of the VIX indices for two equal subsamples. The overall results support the premise that Fridays are associated with a decrease in the VIX (meaning an uptick in mood), and Mondays are associated with an increase in the VIX (meaning a deterioration in mood) in both subsamples. "\*\*\*\*", "\*\*\*", and "\*\*" indicate the statistical significance at the 1%, 5%, and 10% levels, respectively.

**Table S5.** Changes in the VIX on Monday contingent on its direction of change on Friday.

**Panel A: Apple.**

| Year           | Percentage of Mondays the VIX Advanced After: |               | Mean Percent Change of VIX on Monday After: |                   | Median Percent Change of VIX on Monday After: |             |
|----------------|-----------------------------------------------|---------------|---------------------------------------------|-------------------|-----------------------------------------------|-------------|
|                | "+" Friday                                    | "-" Friday    | "+" Friday                                  | "-" Friday        | "+" Friday                                    | "-" Friday  |
| 2011           | 50.00%                                        | 61.54%        | -1.44<br>(-0.44)                            | 1.17<br>(0.83)    | -1.99                                         | 1.37        |
| 2012           | 61.11%                                        | 53.57%        | 1.72<br>(1.09)                              | 0.41<br>(0.39)    | 0.89                                          | 1.31        |
| 2013           | 66.67%                                        | 69.57%        | 2.25 **<br>(2.22)                           | 1.62 *<br>(1.73)  | 2.36                                          | 1.49        |
| 2014           | 51.72%                                        | 60.00%        | 1.23<br>(1.09)                              | 1.52<br>(1.01)    | 0.06                                          | 0.83        |
| 2015           | 51.72%                                        | 43.75%        | 1.73<br>(0.94)                              | -0.99<br>(-0.78)  | 0.09                                          | -1.03       |
| 2016           | 52.94%                                        | 55.56%        | -1.29<br>(-0.73)                            | 1.36<br>(1.17)    | 1.91                                          | 1.25        |
| 2017           | 70.59%                                        | 67.86%        | 1.78<br>(1.04)                              | -0.77<br>(-0.42)  | 3.21                                          | 1.83        |
| 2018           | 38.10%                                        | 53.85%        | -0.63<br>(-0.29)                            | 1.69<br>(1.03)    | -0.88                                         | 1.52        |
| 2019           | 61.11%                                        | 79.31%        | 1.46<br>(1.11)                              | 3.04 **<br>(2.18) | 1.07                                          | 1.77        |
| <b>Average</b> | <b>56.00%</b>                                 | <b>60.55%</b> | <b>0.67</b>                                 | <b>0.90</b>       | <b>1.12</b>                                   | <b>1.03</b> |

Notes: A year-by-year description of the changes in the VXAZN on Monday contingent on its direction of change on Friday.

**Panel B: VXAZN.**

| Year | Percentage of Mondays the VIX Advanced After: |            | Mean Percent Change in the VIX on Monday After: |                  | Median Percent Change in the VIX on Monday After: |            |
|------|-----------------------------------------------|------------|-------------------------------------------------|------------------|---------------------------------------------------|------------|
|      | "+" Friday                                    | "-" Friday | "+" Friday                                      | "-" Friday       | "+" Friday                                        | "-" Friday |
| 2011 | 80.00%                                        | 58.33%     | 2.48<br>(1.86)                                  | 1.18<br>(0.94)   | 1.75                                              | 0.47       |
| 2012 | 66.67%                                        | 67.74%     | 1.91<br>(1.48)                                  | 1.76<br>(1.53)   | 2.87                                              | 3.24       |
| 2013 | 82.35%                                        | 70.00%     | 3.81 ***<br>(4.98)                              | 2.14 *<br>(1.73) | 3.50                                              | 2.18       |
| 2014 | 88.24%                                        | 48.28%     | 3.68 **<br>(2.42)                               | 1.21<br>(1.07)   | 1.90                                              | -0.17      |
| 2015 | 73.68%                                        | 53.85%     | 5.75 **                                         | 1.13             | 3.52                                              | 0.78       |

|                |               |               |             |             |             |             |
|----------------|---------------|---------------|-------------|-------------|-------------|-------------|
|                |               |               | (2.44)      | (1.19)      |             |             |
|                |               |               | -0.21       | 0.41        |             |             |
| 2016           | 44.44%        | 53.85%        | (-0.06)     | (0.26)      | -0.57       | 0.88        |
|                |               |               | 2.32        | 0.26        |             |             |
| 2017           | 38.46%        | 74.19%        | (0.63)      | (0.09)      | -1.80       | 2.92        |
|                |               |               | 3.55        | 1.97        |             |             |
| 2018           | 70.59%        | 53.33%        | (1.72)      | (1.00)      | 0.93        | 0.92        |
|                |               |               | 2.84        | 2.28 **     |             |             |
| 2019           | 61.11%        | 72.41%        | (1.29)      | (2.61)      | 2.15        | 2.61        |
|                |               |               | 3.33        | 0.68        |             |             |
| 2020           | 80.00%        | 50.00%        | (0.41)      | (0.13)      | 7.87        | 0.68        |
| <b>Average</b> | <b>68.55%</b> | <b>60.20%</b> | <b>2.94</b> | <b>1.30</b> | <b>2.21</b> | <b>1.45</b> |

Panel C: VXGSCLS.

| Year           | Percentage of Mondays the<br>VIX Advanced After: |               | Mean Percent Change in the<br>VIX on Monday After: |                    | Median Percent Change in the<br>VIX on Monday After: |             |
|----------------|--------------------------------------------------|---------------|----------------------------------------------------|--------------------|------------------------------------------------------|-------------|
|                | "+" Friday                                       | "-" Friday    | "+" Friday                                         | "-" Friday         | "+" Friday                                           | "-" Friday  |
| 2011           | 0.00%                                            | 66.67%        | -4.35<br>(-3.78)                                   | 3.03<br>(1.38)     | -4.35                                                | 2.01        |
| 2012           | 52.63%                                           | 62.96%        | 0.44<br>(0.50)                                     | 1.46<br>(1.59)     | 0.30                                                 | 1.55        |
| 2013           | 75.00%                                           | 70.59%        | 2.56 **<br>(2.75)                                  | 1.94 ***<br>(2.78) | 3.04                                                 | 1.58        |
| 2014           | 72.22%                                           | 70.37%        | 3.55 **<br>(2.43)                                  | 0.79<br>(1.02)     | 3.93                                                 | 1.63        |
| 2015           | 47.37%                                           | 60.00%        | 1.67<br>(0.84)                                     | 1.58<br>(1.37)     | -0.22                                                | 1.35        |
| 2016           | 36.36%                                           | 65.63%        | 1.86<br>(0.89)                                     | 0.57<br>(0.74)     | -0.94                                                | 1.27        |
| 2017           | 26.67%                                           | 43.33%        | -2.86<br>(-1.61)                                   | 1.84<br>(1.16)     | -1.29                                                | -0.79       |
| 2018           | 38.10%                                           | 57.69%        | -1.83<br>(-0.71)                                   | 1.55<br>(1.43)     | -1.08                                                | 0.38        |
| 2019           | 57.89%                                           | 64.29%        | 0.74<br>(0.25)                                     | 0.71<br>(0.59)     | 0.44                                                 | 1.95        |
| 2020           | 66.67%                                           | 100.00%       | -2.17<br>(-0.32)                                   | 7.84<br>(0.00)     | 1.38                                                 | 7.84        |
| <b>Average</b> | <b>47.29%</b>                                    | <b>66.15%</b> | <b>-0.04</b>                                       | <b>2.13</b>        | <b>0.12</b>                                          | <b>1.88</b> |

Panel D: VXGOG.

| Year | Percentage of Mondays the<br>VIX Advanced After: |            | Mean Percent Change in the<br>VIX on Monday After: |                    | Median Percent Change in the<br>VIX on Monday After: |            |
|------|--------------------------------------------------|------------|----------------------------------------------------|--------------------|------------------------------------------------------|------------|
|      | "+" Friday                                       | "-" Friday | "+" Friday                                         | "-" Friday         | "+" Friday                                           | "-" Friday |
| 2011 | 50.00%                                           | 69.23%     | 1.84<br>(0.48)                                     | 1.41<br>(1.05)     | 1.17                                                 | 1.71       |
| 2012 | 45.00%                                           | 76.00%     | -0.96<br>(-1.52)                                   | 3.63 ***<br>(3.77) | 4.37                                                 | 2.43       |
| 2013 | 87.50%                                           | 70.97%     | 3.54 ***                                           | 1.21               | 3.95                                                 | 2.57       |

|                |               |               |             |             |             |             |
|----------------|---------------|---------------|-------------|-------------|-------------|-------------|
|                |               |               | (-2.69)     | (1.24)      |             |             |
|                |               |               | 4.81 ***    | 1.29        |             |             |
| 2014           | 85.00%        | 69.23%        | (3.87)      | (0.76)      | 5.30        | 2.13        |
|                |               |               | 1.64        | 4.16 **     |             |             |
| 2015           | 50.00%        | 66.67%        | (0.79)      | (2.12)      | -0.01       | 2.69        |
|                |               |               | 1.74        | 3.15 *      |             |             |
| 2016           | 60.00%        | 64.71%        | (0.69)      | (1.89)      | 2.03        | 1.52        |
|                |               |               | -1.21       | 2.87        |             |             |
| 2017           | 38.46%        | 78.13%        | (-0.33)     | (1.67)      | -1.27       | 3.02        |
|                |               |               | 2.52        | 3.53        |             |             |
| 2018           | 47.06%        | 53.33%        | (1.29)      | (1.54)      | -0.09       | 0.77        |
|                |               |               | 4.74 **     | 1.52        |             |             |
| 2019           | 88.89%        | 65.52%        | (2.64)      | (1.18)      | 5.15        | 1.77        |
|                |               |               | 8.53        | 8.02        |             |             |
| 2020           | 80.00%        | 100.00%       | (2.05)      | (2.29)      | 5.59        | 8.02        |
| <b>Average</b> | <b>63.19%</b> | <b>71.38%</b> | <b>2.72</b> | <b>3.08</b> | <b>2.62</b> | <b>2.66</b> |

Panel E: VXIBM.

| Year           | Percentage of Mondays the<br>VIX Advanced After: |               | Mean Percent Change in the<br>VIX on Monday After: |                    | Median Percent Change in the<br>VIX on Monday After: |             |
|----------------|--------------------------------------------------|---------------|----------------------------------------------------|--------------------|------------------------------------------------------|-------------|
|                | "+" Friday                                       | "-" Friday    | "+" Friday                                         | "-" Friday         | "+" Friday                                           | "-" Friday  |
|                |                                                  |               |                                                    |                    |                                                      |             |
| 2011           | 50.00%                                           | 54.55%        | -2.06<br>(-0.66)                                   | 0.81<br>(0.42)     | -0.13                                                | 0.20        |
| 2012           | 72.22%                                           | 55.56%        | 1.42<br>(1.31)                                     | 0.15<br>(0.13)     | 2.48                                                 | 1.48        |
| 2013           | 78.26%                                           | 72.73%        | 1.80 **<br>(2.37)                                  | 1.49<br>(0.96)     | 1.95                                                 | 1.89        |
| 2014           | 89.47%                                           | 57.69%        | 4.21 ***<br>(3.70)                                 | -0.52<br>(-0.46)   | 3.33                                                 | 0.79        |
| 2015           | 61.11%                                           | 70.37%        | 3.97 *<br>(1.79)                                   | 3.10 ***<br>(3.24) | 2.38                                                 | 3.04        |
| 2016           | 50.00%                                           | 69.23%        | 0.50<br>(0.33)                                     | 1.54 *<br>(1.86)   | 0.61                                                 | 1.15        |
| 2017           | 44.44%                                           | 69.23%        | -0.51<br>(-0.33)                                   | 1.55<br>(1.51)     | -0.06                                                | 2.47        |
| 2018           | 30.00%                                           | 69.57%        | -0.44<br>(-0.20)                                   | 2.68 *<br>(1.79)   | -2.86                                                | 2.90        |
| 2019           | 61.11%                                           | 65.52%        | 0.95<br>(0.57)                                     | 1.95<br>(1.50)     | 1.05                                                 | 1.59        |
| 2020           | 50.00%                                           | 100.00%       | 6.86<br>(1.65)                                     | 11.00              | 3.78                                                 | 11.00       |
| <b>Average</b> | <b>58.66%</b>                                    | <b>68.44%</b> | <b>1.67</b>                                        | <b>2.38</b>        | <b>1.25</b>                                          | <b>2.65</b> |

Panel F: VXD.

| Year | Percentage of Mondays the<br>VIX Advanced After: |            | Mean Percent Change in the<br>VIX on Monday After: |            | Median Percent Change in the<br>VIX on Monday After: |            |
|------|--------------------------------------------------|------------|----------------------------------------------------|------------|------------------------------------------------------|------------|
|      | "+" Friday                                       | "-" Friday | "+" Friday                                         | "-" Friday | "+" Friday                                           | "-" Friday |
|      |                                                  |            |                                                    |            |                                                      |            |
| 2013 | 100.00%                                          | 75.00%     | 5.11                                               | 1.37       | 5.96                                                 | 1.97       |

|                |               |               |                   |                  |             |             |
|----------------|---------------|---------------|-------------------|------------------|-------------|-------------|
|                |               |               | (0.05)            | (1.68)           |             |             |
| 2014           | 35.29%        | 65.52%        | -0.53<br>(-0.23)  | 1.58 *<br>(2.10) | -1.30       | 2.09        |
| 2015           | 41.18%        | 66.67%        | 0.31<br>(0.40)    | 2.36 *<br>(2.36) | -2.38       | 2.22        |
| 2016           | 47.06%        | 55.56%        | 0.32<br>(0.69)    | 0.51<br>(0.40)   | -1.93       | 0.90        |
| 2017           | 44.44%        | 61.54%        | -1.72<br>(-1.50)  | 0.25<br>(0.20)   | -0.18       | 0.98        |
| 2018           | 65.00%        | 48.15%        | 3.62 **<br>(2.56) | 1.90<br>(1.11)   | 1.70        | -0.18       |
| 2019           | 56.25%        | 67.74%        | 3.92 **<br>(2.80) | 2.11 *<br>(2.21) | 1.57        | 1.59        |
| 2020           | 33.33%        | 0.00%         | 5.48<br>(0.01)    | 0.00<br>(0.00)   | -0.35       | 0.00        |
| <b>Average</b> | <b>52.82%</b> | <b>55.02%</b> | <b>2.06</b>       | <b>1.26</b>      | <b>0.39</b> | <b>1.20</b> |

**Panel G: VXN.**

| Year | Percentage of Mondays the VIX Advanced After: |            | Mean Percent Change in the VIX on Monday After: |                   | Median Percent Change in the VIX on Monday After: |            |
|------|-----------------------------------------------|------------|-------------------------------------------------|-------------------|---------------------------------------------------|------------|
|      | "+" Friday                                    | "-" Friday | "+" Friday                                      | "-" Friday        | "+" Friday                                        | "-" Friday |
| 2000 | 25.00%                                        | 0.00%      | -0.95<br>(1.02)                                 | 0.00<br>(0.00)    | -1.16                                             | 0.00       |
| 2001 | 30.00%                                        | 37.50%     | -0.75<br>(-0.74)                                | -1.08<br>(-1.01)  | -1.51                                             | -0.30      |
| 2002 | 52.94%                                        | 46.67%     | 0.53<br>(1.80)                                  | -1.07<br>(-1.02)  | 0.63                                              | -0.50      |
| 2003 | 55.56%                                        | 44.44%     | 0.85<br>(0.83)                                  | -0.91<br>(-0.75)  | 0.75                                              | -0.28      |
| 2004 | 60.00%                                        | 46.67%     | 1.96<br>(1.05)                                  | 1.02<br>(0.96)    | 2.14                                              | -0.56      |
| 2005 | 33.33%                                        | 74.19%     | 0.04<br>(1.00)                                  | 2.43<br>(2.05)    | -0.64                                             | 2.68       |
| 2006 | 78.95%                                        | 65.38%     | 3.98 **<br>(2.45)                               | 1.72 *<br>(2.05)  | 3.48                                              | 1.43       |
| 2007 | 60.00%                                        | 85.19%     | 0.38<br>(0.20)                                  | 3.04 **<br>(2.60) | 1.70                                              | 2.69       |
| 2008 | 73.68%                                        | 70.37%     | 4.16 **<br>(2.78)                               | 1.47<br>(1.02)    | 2.92                                              | 2.30       |
| 2009 | 62.50%                                        | 65.52%     | 1.94<br>(1.10)                                  | 1.98<br>(1.15)    | 1.17                                              | 1.71       |
| 2010 | 43.75%                                        | 55.17%     | -3.04<br>(-2.01)                                | 0.90<br>(0.66)    | -1.83                                             | -0.02      |
| 2011 | 55.00%                                        | 58.33%     | 2.75<br>(2.20)                                  | 1.24<br>(1.20)    | 0.66                                              | 2.22       |
| 2012 | 40.00%                                        | 66.67%     | -0.11<br>(-0.10)                                | 1.80<br>(1.70)    | -0.19                                             | 2.36       |
| 2013 | 54.55%                                        | 63.89%     | 0.76<br>(0.60)                                  | 3.65 *<br>(1.78)  | 0.40                                              | 1.74       |
| 2014 | 72.22%                                        | 57.14%     | 3.73 **<br>(2.56)                               | -0.02<br>(-0.01)  | 3.02                                              | 0.17       |
| 2015 | 54.17%                                        | 65.00%     | 3.81 **<br>(2.55)                               | 0.96<br>(0.1)     | 2.71                                              | 1.27       |
| 2016 | 57.14%                                        | 50.00%     | 1.48<br>(1.00)                                  | 0.52<br>(0.30)    | 2.82                                              | 0.04       |
| 2017 | 53.85%                                        | 61.29%     | -0.45<br>(-0.30)                                | 1.06<br>(1.01)    | 2.25                                              | 0.95       |
| 2018 | 66.67%                                        | 58.62%     | 5.67 **<br>(2.78)                               | 2.19 **<br>(2.56) | 2.36                                              | 1.50       |

|                |               |               |                   |                   |             |             |
|----------------|---------------|---------------|-------------------|-------------------|-------------|-------------|
| 2019           | 62.50%        | 64.52%        | 5.43 **<br>(2.55) | 2.52 **<br>(2.60) | 4.52        | 1.92        |
| 2020           | 50.00%        | 0.00%         | 5.70<br>(1.05)    | 0.00<br>(0.00)    | 0.00        | 0.00        |
| <b>Average</b> | <b>54.37%</b> | <b>54.12%</b> | <b>1.80</b>       | <b>1.12</b>       | <b>1.25</b> | <b>1.02</b> |

Panel H: RVX.

| Year           | Percentage of Mondays the<br>VIX Advanced After: |               | Mean Percent Change in the<br>VIX on Monday After: |                    | Median Percent Change in the<br>VIX on Monday After: |             |
|----------------|--------------------------------------------------|---------------|----------------------------------------------------|--------------------|------------------------------------------------------|-------------|
|                | "+" Friday                                       | "-" Friday    | "+" Friday                                         | "-" Friday         | "+" Friday                                           | "-" Friday  |
| 2011           | 50.00%                                           | 60.00%        | 0.43<br>(0.22)                                     | 2.83<br>(1.31)     | 0.21                                                 | 3.48        |
| 2012           | 38.89%                                           | 70.37%        | -0.88<br>(-0.71)                                   | 2.21 *<br>(1.93)   | -1.07                                                | 2.48        |
| 2013           | 58.82%                                           | 73.33%        | 3.05<br>(1.44)                                     | 2.74 ***<br>(2.74) | 1.00                                                 | 1.25        |
| 2014           | 66.67%                                           | 57.14%        | 3.09 *<br>(2.03)                                   | 0.29<br>(0.33)     | 3.64                                                 | 0.51        |
| 2015           | 56.00%                                           | 55.00%        | 2.75<br>(1.37)                                     | 1.23<br>(0.78)     | 0.22                                                 | 1.55        |
| 2016           | 44.44%                                           | 65.38%        | -0.16<br>(-0.09)                                   | 1.23 *<br>(1.74)   | -0.34                                                | 1.74        |
| 2017           | 62.50%                                           | 65.52%        | 0.41<br>(0.25)                                     | 0.80<br>(0.79)     | 1.20                                                 | 0.83        |
| 2018           | 58.82%                                           | 57.14%        | 5.63<br>(1.28)                                     | 1.06<br>(0.67)     | 1.42                                                 | 1.01        |
| 2019           | 53.33%                                           | 65.63%        | 3.55<br>(1.63)                                     | 2.27 *<br>(1.91)   | 2.35                                                 | 2.20        |
| 2020           | 60.00%                                           | 0.00%         | 9.00<br>(0.51)                                     | -9.37<br>(0.00)    | 0.75                                                 | -9.37       |
| <b>Average</b> | <b>54.95%</b>                                    | <b>56.95%</b> | <b>2.69</b>                                        | <b>0.53</b>        | <b>0.94</b>                                          | <b>0.57</b> |

Panel I: TYVIX.

| Year           | Percentage of Mondays the<br>VIX Advanced After: |               | Mean Percent Change in the<br>VIX on Monday After: |                    | Median Percent Change in the<br>VIX on Monday After: |             |
|----------------|--------------------------------------------------|---------------|----------------------------------------------------|--------------------|------------------------------------------------------|-------------|
|                | "+" Friday                                       | "-" Friday    | "+" Friday                                         | "-" Friday         | "+" Friday                                           | "-" Friday  |
| 2013           | 63.64%                                           | 61.11%        | 2.35<br>(1.42)                                     | 2.92 *<br>(2.03)   | 0.87                                                 | 1.25        |
| 2014           | 66.67%                                           | 74.07%        | 1.81<br>(1.69)                                     | 1.31 *<br>(1.91)   | 1.94                                                 | 1.37        |
| 2015           | 66.67%                                           | 78.57%        | 3.08 **<br>(2.61)                                  | 2.52 ***<br>(3.59) | 2.14                                                 | 2.01        |
| 2016           | 56.25%                                           | 67.86%        | 1.70<br>(1.28)                                     | 2.21 ***<br>(2.84) | 1.78                                                 | 2.38        |
| 2017           | 66.67%                                           | 78.79%        | -1.90<br>(-0.93)                                   | 2.31 ***<br>(4.54) | 0.71                                                 | 2.47        |
| 2018           | 52.94%                                           | 76.67%        | 0.75<br>(0.91)                                     | 2.70 ***<br>(3.82) | 0.41                                                 | 2.43        |
| 2019           | 64.29%                                           | 78.13%        | 2.39<br>(1.65)                                     | 2.18 **<br>(2.19)  | 1.48                                                 | 1.74        |
| 2020           | 80.00%                                           | 0.00%         | 5.06<br>(1.42)                                     | -1.35<br>(0.00)    | 3.29                                                 | -1.35       |
| <b>Average</b> | <b>64.64%</b>                                    | <b>64.40%</b> | <b>1.90</b>                                        | <b>1.85</b>        | <b>1.58</b>                                          | <b>1.54</b> |

Notes: A year-by-year snapshot description of the changes in the VIX on Monday contingent on its direction of change on Friday. “\*\*\*”, “\*\*”, and “\*” indicate the statistical significance at the 1%, 5%, and 10% levels, respectively.
